# Supplementary material
Source: publisher figshare collection journal article supplement (https://acs.figshare.com/ndownloader/files/3818611)
Supplement: Supplementary file 1 [file 3818611]

Supporting Information for

**Expedient Synthesis of Pyrroloquinolinones by Rh-Catalyzed Annulation of N-Carbamoyl Indolines with Alkynes through a Directed C-H Functionalization/C-N Cleavage Sequence**

Xiao-Fei Yang, Xu-Hong Hu, and Teck-Peng Loh

*Division of Chemistry and Biological Chemistry, School of Physical and Mathematical Sciences,*

*Nanyang Technological University, Singapore 637371*

[teckpeng@ntu.edu.sg](mailto:teckpeng@ntu.edu.sg)

| <b>Table of contents</b>          | <b>Page No.</b> |
|-----------------------------------|-----------------|
| General information               | <b>S-2</b>      |
| Experimental section              | <b>S-3</b>      |
| Characterization data of products | <b>S-5</b>      |
| NMR spectra of products           | <b>S-13</b>     |
| X-ray Data                        | <b>S-48</b>     |

## General information

[RhCp\*Cl<sub>2</sub>]<sub>2</sub>, Zn(OTf)<sub>2</sub>, Cu(OTf)<sub>2</sub> and solvents were purchased from commercial suppliers and used as received unless otherwise noted. All reactions were carried out using 4 mL sample vial or standard Schlenk technic. Reactions were monitored through thin layer chromatography [Merck 60 F254 precoated silica gel plate (0.2 mm thickness)]. Subsequent to elution, spots were visualized using UV radiation (254 nm) on Spectroline Model ENF-24061/F 254 nm. Further visualization was possible using basic solution of potassium permanganate. Flash chromatography was performed using Merck silica gel 60 with distilled solvents. HRMS spectra were recorded on a Waters Q–Tof Premier Spectrometer. <sup>1</sup>H NMR and <sup>13</sup>C NMR spectra were recorded using Bruker Avance 400 MHz spectrometers. Chemical shifts for <sup>1</sup>H NMR and <sup>13</sup>C NMR spectra were recorded using Bruker Avance 400 MHz spectrometers. Chemical shifts for <sup>1</sup>H NMR spectra are reported as δ in units of parts per million (ppm) downfield from SiMe<sub>4</sub> (δ 0.0) and relative to the signal of SiMe<sub>4</sub> (δ 0.00, singlet). Multiplicities were given as: s (singlet); brs (broad singlet); d (doublet); t (triplet); q (quartet); dd (doublets of doublet); ddd (doublets of doublets of doublet); td (triplet of doublet); m (multiplets); ddt (doublet of doublet of triplet) and etc. Coupling constants are reported as a *J* value in Hz. Carbon nuclear magnetic resonance spectra (<sup>13</sup>C NMR) are reported as δ in units of parts per million (ppm) downfield from SiMe<sub>4</sub> (δ 0.0) and relative to the signal of chloroform-d (δ 77.00, triplet).

## Experimental section

### Substrate synthesis

Starting materials **1** were synthesized using reported method.<sup>[1]</sup>

### Rhodium-catalyzed annulation of *N*-carbamoyl indolines with alkynes

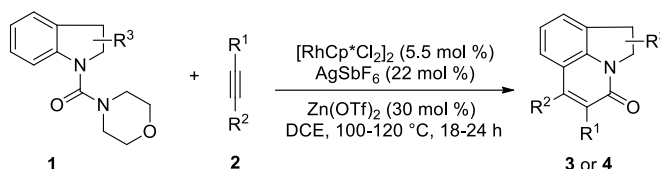

**General reaction procedure A:** The indoline **1** (0.21 mmol, 1.5 equiv), alkyne (0.14 mmol, 1.0 equiv), [RhCp\*Cl<sub>2</sub>]<sub>2</sub> (0.0077 mmol, 5.5 mol %), AgSbF<sub>6</sub> (0.0308 mmol, 22 mol %), Zn(OTf)<sub>2</sub> (0.042 mmol, 30 mol %) and DCE (1.0 mL) were placed in a 4 mL sample vial under N<sub>2</sub>. After stirring at 100 °C for 18 hours. Removal of the solvent *in vacuo* and purification by column chromatography on silica gel (eluted by hexane/ethyl acetate) afforded the desired product **3 or 4**.

**General reaction procedure B:** The indoline **1** (0.21 mmol, 1.5 equiv), alkyne (0.14 mmol, 1.0 equiv), [RhCp\*Cl<sub>2</sub>]<sub>2</sub> (0.0077 mmol, 5.5 mol %), AgSbF<sub>6</sub> (0.0308 mmol, 22 mol %), Zn(OTf)<sub>2</sub> (0.042 mmol, 30 mol %) and DCE (1.0 mL) were placed in a 4 mL sample vial under N<sub>2</sub>. After stirring at 120 °C for 24 hours. Removal of the solvent *in vacuo* and purification by column chromatography on silica gel (eluted by hexane/ethyl acetate) afforded the desired product **3 or 4**.

### Derivatization of the pyrroloquinolinone products

#### Reaction procedure C:

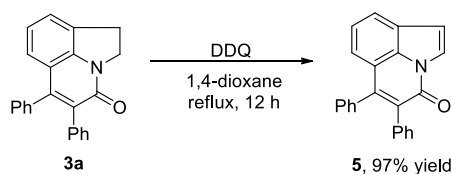

**Synthetic procedure:** **3a** (0.1 mmol) and DDQ (0.2 mmol) were placed in a 10 mL Schlenk tube. 1,4-dioxane (1.0 mL) was added to the reaction vessel. The solution was then refluxed with stirring for 12 h. Removal of the solvent *in vacuo* and purification by column chromatography on silica gel (eluted by hexane/ethyl acetate) afforded the desired product **5** (31.1 mg, 0.097 mmol).

#### Reaction procedure D:

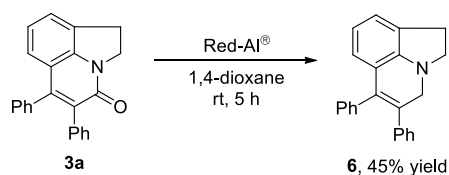

**Synthetic procedure:** To a solution of **3a** (0.1 mmol) in 1,4-dioxane (1.0 mL) was added dropwise a solution of Red-Al<sup>®</sup> in toluene (65% w/w 1.0 mmol, 10.0 equiv) and the mixture was stirred at room temperature for 5 h. Removal of the solvent *in vacuo*. Excess hydride was quenched with water (1.0 mL) and 20% sodium hydroxide solution (0.3 mL). The aqueous mixture was extracted with dichloromethane (5.0 mL  $\times$  2) and the combined organic fractions were dried over Na<sub>2</sub>SO<sub>4</sub>, filtered. Removal of the solvent *in vacuo* and purification by column chromatography on silica gel (eluted by hexane/ethyl acetate) afforded the desired product **6** (13.9 mg, 0.045 mmol).

#### Reaction procedure E:

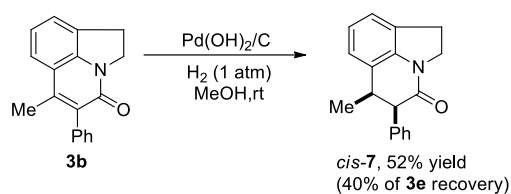

**Synthetic procedure:** **3b** (0.1 mmol) and Pd(OH)<sub>2</sub>/C (10.0 mg) were placed in a 10 mL Schlenk tube. Methanol (1.0 mL) was added. Then the mixture was stirred at room temperature under hydrogen (balloon) overnight. The resultant solution was filtered over celite and washed with ethyl acetate. Removal of the solvent *in vacuo* and purification by column chromatography on silica gel (eluted by hexane/ethyl acetate) afforded *cis*-**7** (13.7 mg, 0.052 mmol).

Reference:

[1] L. Jiao, M. Oestreich, *Org. Lett.* 2013, **15**, 5374.

## Characterization data of products

### 5,6-Diphenyl-1H-pyrrolo[3,2,1-*ij*]quinolin-4(2H)-one (3a)

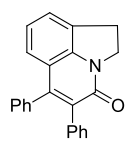

Following the general reaction procedure A, **3a** was obtained as a white solid (33 mg, 0.10 mmol, Yield: 73%); m.p. = 203-205 °C; <sup>1</sup>H NMR (400 MHz, CDCl<sub>3</sub>) δ 7.37 (dd, *J* = 6.8, 1.2 Hz, 1H), 7.31 – 7.25 (m, 3H), 7.22 – 7.07 (m, 9H), 4.70 – 4.47 (t, *J* = 8.1 Hz, 2H), 3.52 (t, *J* = 8.1 Hz, 2H); <sup>13</sup>C NMR (101 MHz, CDCl<sub>3</sub>) δ 160.27, 146.91, 141.64, 135.92, 135.45, 133.30, 130.90 × 2, 130.38, 129.72 × 2, 127.92 × 2, 127.49, 127.36 × 2, 126.84, 124.73, 123.63, 122.92, 118.48, 47.27, 27.13; HRMS (ESI): *m/z* calculated for [C<sub>23</sub>H<sub>18</sub>NO]<sup>+</sup> [*M* + *H*]<sup>+</sup>: 324.1388, Found: 324.1381; FTIR (NaCl): ν 3053, 2924, 1645, 1637, 1616, 1604, 1338, 1265, 1072 cm<sup>-1</sup>

### 5,6-Bis(4-bromophenyl)-1H-pyrrolo[3,2,1-*ij*]quinolin-4(2H)-one (3b)

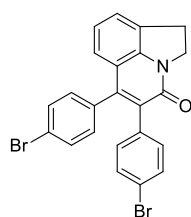

Following the general reaction procedure A, **3b** was obtained as a white solid (47.6 mg, 0.10 mmol, Yield: 71%); m.p. = 266-268 °C; <sup>1</sup>H NMR (400 MHz, CDCl<sub>3</sub>) δ 7.45 (d, *J* = 8.4 Hz, 2H), 7.37 (d, *J* = 6.4 Hz, 1H), 7.33 (d, *J* = 8.4 Hz, 2H), 7.11 – 7.04 (m, 2H), 7.01 (d, *J* = 2.4 Hz, 2H), 6.98 (d, *J* = 2.4 Hz, 2H), 4.53 (t, *J* = 8.1 Hz, 2H), 3.49 (t, *J* = 8.1 Hz, 2H); <sup>13</sup>C NMR (101 MHz, CDCl<sub>3</sub>) δ 159.78, 145.93, 141.73, 134.56, 134.10, 132.60 × 2, 132.20, 131.54 × 2, 131.33 × 2, 130.87 × 2, 130.63, 125.25, 123.38, 123.30, 122.12, 121.46, 117.98, 47.41, 27.14; HRMS (ESI): *m/z* calculated for [C<sub>23</sub>H<sub>16</sub>Br<sub>2</sub>NO]<sup>+</sup> [*M* + *H*]<sup>+</sup>: 479.9599, Found: 479.9597; FTIR (NaCl): ν 3053, 2983, 1639, 1587, 1490, 1419, 1265, 1074, 1010, 894 cm<sup>-1</sup>

### 5,6-Di-*m*-tolyl-1H-pyrrolo[3,2,1-*ij*]quinolin-4(2H)-one (3c)

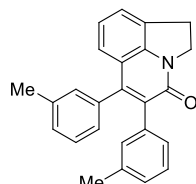

Following the general reaction procedure A, **3c** was obtained as a white solid (33.4 mg, 0.09 mmol, Yield: 68%); m.p. = 134-136 °C; <sup>1</sup>H NMR (400 MHz, CDCl<sub>3</sub>) δ 7.34 (d, *J* = 6.8 Hz, 1H), 7.18 – 7.01 (m, 5H), 6.98 (s, 1H), 6.93 – 6.87 (m, 4H), 4.54 (t, *J* = 8.1 Hz, 2H), 3.48 (t, *J* = 8.1 Hz, 2H), 2.26 (s, 3H), 2.21 (s, 3H); <sup>13</sup>C NMR (101 MHz, CDCl<sub>3</sub>) δ 160.48, 147.08, 141.58, 137.41, 136.68, 135.88, 135.37, 133.40, 131.55, 130.39, 130.32, 128.19, 127.92, 127.77, 127.66, 127.25, 126.81, 124.64, 123.76, 122.92, 118.67, 47.31, 27.18, 21.33 × 2; HRMS (ESI): *m/z* calculated for [C<sub>25</sub>H<sub>22</sub>NO]<sup>+</sup> [*M* + *H*]<sup>+</sup>: 352.1701, Found: 352.1703; FTIR (NaCl): ν 3049, 2920, 2856, 1643, 1616, 1602, 1489, 1404, 1340, 1265, 1190 cm<sup>-1</sup>

### 5,6-Bis(3-methoxyphenyl)-1H-pyrrolo[3,2,1-*ij*]quinolin-4(2H)-one (3d)

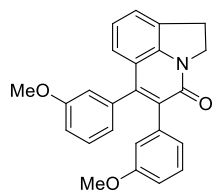

Following the general reaction procedure A, **3d** was obtained as a yellow oil (35.4 mg, 0.09 mmol, Yield: 66%); NMR (400 MHz, CDCl<sub>3</sub>) δ 7.36 (d, *J* = 7.1 Hz, 1H), 7.21 (t, *J* = 7.9 Hz, 1H), 7.17 (d, *J* = 8.8 Hz, 1H), 7.09 (d, *J* = 7.1 Hz, 1H), 7.07 (d, *J* = 7.1 Hz, 1H), 6.81 – 6.76 (m, 3H), 6.73 – 6.61 (m, 3H), 4.55 (t, *J* = 7.9 Hz, 2H), 3.65 (s, 3H), 3.63 (s, 3H), 3.49 (t, *J* = 7.9 Hz, 2H); <sup>13</sup>C NMR (101 MHz, CDCl<sub>3</sub>) δ 160.21, 159.19, 158.80, 147.12, 141.52, 137.10, 136.64, 132.85, 130.54, 129.04, 128.46, 124.93, 123.73, 123.46, 123.23, 122.14, 118.46, 116.05, 115.15, 113.52, 113.35, 55.17, 55.09, 47.48, 27.15; HRMS (ESI): *m/z* calculated for [C<sub>25</sub>H<sub>22</sub>NO<sub>3</sub>]<sup>+</sup> [*M* + *H*]<sup>+</sup>: 384.1600, Found: 384.1609; FTIR (NaCl): ν 3061, 2956, 1645, 1614, 1600, 1456, 1317, 1045 cm<sup>-1</sup>

**6-Methyl-5-phenyl-1H-pyrrolo[3,2,1-ij]quinolin-4(2H)-one (3e)**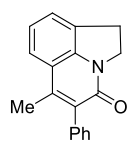

Following the general reaction procedure B, **3e** was obtained as a white solid (27.4 mg, 0.11 mmol, Yield: 75%); m.p. = 152-154 °C; <sup>1</sup>H NMR (400 MHz, CDCl<sub>3</sub>) δ 7.50 (d, *J* = 8.1 Hz, 1H), 7.43 (t, *J* = 7.6 Hz, 2H), 7.37 – 7.34 (m, 2H), 7.29 – 7.27 (m, 2H), 7.18 (t, *J* = 7.6 Hz, 1H), 4.52 – 4.38 (t, *J* = 8.1 Hz, 2H), 3.43 (t, *J* = 8.1 Hz, 2H), 2.30 (s, 3H); <sup>13</sup>C NMR (101 MHz, CDCl<sub>3</sub>) δ 160.26, 142.18, 141.22, 136.28, 133.68, 130.57, 130.21 × 2, 128.11 × 2, 127.40, 124.63, 122.91, 121.56, 118.81, 47.00, 27.14, 16.10; HRMS (ESI): *m/z* calculated for [C<sub>18</sub>H<sub>16</sub>NO]<sup>+</sup> [*M* + *H*]<sup>+</sup>: 262.1232, Found: 262.1236; FTIR (NaCl): ν 3053, 2958, 1641, 1598, 1487, 1408, 1346, 1265, 1029 cm<sup>-1</sup>

**6-Methyl-5-(p-tolyl)-1H-pyrrolo[3,2,1-ij]quinolin-4(2H)-one (3f)**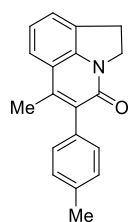

Following the general reaction procedure, **3f** was obtained as a yellow solid (18.1 mg, 0.07 mmol, Yield: 47%); <sup>1</sup>H m.p. = 201-203 °C; NMR (400 MHz, CDCl<sub>3</sub>) δ 7.49 (d, *J* = 8.4 Hz, 1H), 7.34 (d, *J* = 7.2 Hz, 1H), 7.24 (d, *J* = 8.4 Hz, 2H), 7.21 – 7.14 (m, 3H), 4.51 – 4.39 (t, *J* = 8.1 Hz, 2H), 3.42 (t, *J* = 8.1 Hz, 2H), 2.40 (s, 3H), 2.31 (s, 3H); <sup>13</sup>C NMR (101 MHz, CDCl<sub>3</sub>) δ 160.40, 141.98, 141.18, 137.02, 133.69, 133.22, 130.52, 130.07 × 2, 128.85 × 2, 124.51, 122.84, 121.53, 118.86, 46.99, 27.15, 21.30, 16.12; HRMS (ESI): *m/z* calculated for [C<sub>19</sub>H<sub>18</sub>NO]<sup>+</sup> [*M* + *H*]<sup>+</sup>: 276.1388, Found: 276.1391; FTIR (NaCl): ν 3055, 2980, 1635, 1602, 1508, 1340, 1265, 1112 cm<sup>-1</sup>

**5-(4-Chlorophenyl)-6-methyl-1H-pyrrolo[3,2,1-ij]quinolin-4(2H)-one (3g)**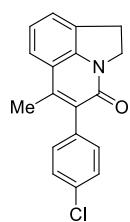

Following the general reaction procedure B, **3g** was obtained as a white solid (25.2 mg, 0.08 mmol, Yield: 61%); m.p. = 214-216 °C; <sup>1</sup>H NMR (400 MHz, CDCl<sub>3</sub>) δ 7.50 (d, *J* = 8.1 Hz, 1H), 7.44 – 7.39 (m, 2H), 7.36 (d, *J* = 7.2 Hz, 1H), 7.24 – 7.17 (m, 3H), 4.45 (t, *J* = 8.1 Hz, 2H), 3.44 (t, *J* = 8.1 Hz, 2H), 2.31 (s, 3H); <sup>13</sup>C NMR (101 MHz, CDCl<sub>3</sub>) δ 160.01, 142.52, 141.25, 134.68, 133.40, 132.43, 131.72 × 2, 130.63, 128.38 × 2, 124.89, 123.06, 121.60, 118.66, 47.04, 27.14, 16.12; HRMS (ESI): *m/z* calculated for [C<sub>18</sub>H<sub>15</sub>ClNO]<sup>+</sup> [*M* + *H*]<sup>+</sup>: 296.0842, Found: 296.0843; FTIR (NaCl): ν 2926, 2852, 1635, 1616, 1458, 1344, 1263, 817cm<sup>-1</sup>

**5-(3-Fluorophenyl)-6-methyl-1H-pyrrolo[3,2,1-ij]quinolin-4(2H)-one (3h)**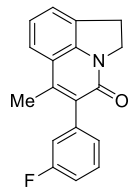

Following the general reaction procedure B, **3h** was obtained as a white solid (19.5 mg, 0.07 mmol, Yield: 50%); m.p. = 145-147 °C; <sup>1</sup>H NMR (400 MHz, CDCl<sub>3</sub>) δ 7.51 (d, *J* = 8.1 Hz, 1H), 7.44 – 7.34 (m, 2H), 7.23 – 7.16 (m, 1H), 7.09 – 6.98 (m, 3H), 4.45 (t, *J* = 8.1 Hz, 2H), 3.44 (t, *J* = 8.1 Hz, 2H), 2.31 (s, 3H); <sup>13</sup>C NMR (101 MHz, CDCl<sub>3</sub>) δ 162.70 (d, *J* = 246.64 Hz), 159.94, 142.69, 141.32, 138.49 (d, *J* = 8.1 Hz), 132.49 (d, *J* = 1.6 Hz), 130.68, 129.66 (d, *J* = 8.4 Hz), 126.06 (d, *J* = 2.9 Hz), 124.97, 123.10, 121.66, 118.63, 117.37 (d, *J* = 21.5 Hz), 114.44 (d, *J* = 21.0 Hz), 47.07, 27.17, 16.09; <sup>19</sup>F NMR (376 MHz, CDCl<sub>3</sub>) δ -113.75; HRMS (ESI): *m/z* calculated for [C<sub>18</sub>H<sub>15</sub>FNO]<sup>+</sup> [*M* + *H*]<sup>+</sup>: 280.1138, Found: 280.1135; FTIR (NaCl): ν 2956, 2924, 1637, 1616, 1604, 1583, 1458, 1406, 1186, 719 cm<sup>-1</sup>

**6-Methyl-5-(naphthalen-2-yl)-1H-pyrrolo[3,2,1-ij]quinolin-4(2H)-one (3i)**

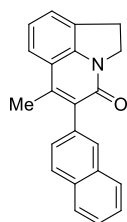

Following the general reaction procedure B, **3i** was obtained as a white solid (34.4 mg, 0.11 mmol, Yield: 79%); m.p. = 140-142 °C; <sup>1</sup>H NMR (400 MHz, CDCl<sub>3</sub>) δ 7.91 (d, *J* = 8.4 Hz, 1H), 7.89 – 7.81 (m, 2H), 7.75 (d, *J* = 8.4 Hz, 1H), 7.52 (d, *J* = 8.4 Hz, 1H), 7.50 – 7.46 (m, 2H), 7.43 (dd, *J* = 8.4, 1.6 Hz, 1H), 7.36 (d, *J* = 7.2 Hz, 1H), 7.22 – 7.16 (m, 1H), 4.47 (t, *J* = 8.1 Hz, 2H), 3.44 (t, *J* = 8.1 Hz, 2H), 2.34 (s, 3H); <sup>13</sup>C NMR (101 MHz, CDCl<sub>3</sub>) δ 160.35, 142.54, 141.28, 133.91, 133.56, 133.31, 132.76, 130.60, 129.28, 128.31, 128.06, 127.65, 127.62, 125.91, 125.81, 124.71, 122.97, 121.60, 118.85, 47.03, 27.16, 16.19; HRMS (ESI): *m/z* calculated for [C<sub>22</sub>H<sub>18</sub>NO]<sup>+</sup> [*M* + *H*]<sup>+</sup>: 312.1388, Found: 312.1387; FTIR (NaCl): ν 3035, 2926, 2854, 1639, 1606, 1406, 1256 cm<sup>-1</sup>

#### 6-Ethyl-5-phenyl-1H-pyrrolo[3,2,1-*ij*]quinolin-4(2H)-one (**3j**)

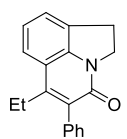

Following the general reaction procedure B, **3j** was obtained as a brown solid (23.9 mg, 0.09 mmol, Yield: 62%); m.p. = 129-131 °C; <sup>1</sup>H NMR (400 MHz, CDCl<sub>3</sub>) δ 7.55 – 7.50 (m, 1H), 7.45 – 7.42 (m, 2H), 7.39 – 7.32 (m, 2H), 7.27 – 7.25 (m, 2H), 7.22 – 7.13 (m, 1H), 4.45 (t, *J* = 8.1 Hz, 2H), 3.43 (t, *J* = 8.1 Hz, 2H), 2.69 (q, *J* = 7.6 Hz, 2H), 1.16 (t, *J* = 7.6 Hz, 3H); <sup>13</sup>C NMR (101 MHz, CDCl<sub>3</sub>) δ 160.51, 148.12, 141.75, 136.36, 133.30, 130.90, 129.76 × 2, 128.23 × 2, 127.37, 124.52, 122.90, 121.61, 117.54, 46.98, 27.12, 22.77, 14.46; HRMS (ESI): *m/z* calculated for [C<sub>19</sub>H<sub>18</sub>NO]<sup>+</sup> [*M* + *H*]<sup>+</sup>: 276.1388, Found: 276.1385; FTIR (NaCl): ν 2972, 2931, 1637, 1608, 1456, 1256 cm<sup>-1</sup>

#### 5-Phenyl-6-propyl-1H-pyrrolo[3,2,1-*ij*]quinolin-4(2H)-one (**3k**)

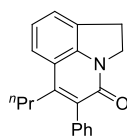

Following the general reaction procedure B, **3k** was obtained as a white solid (23.5 mg, 0.08 mmol, Yield: 58%); m.p. = 185-187 °C; <sup>1</sup>H NMR (400 MHz, CDCl<sub>3</sub>) δ 7.50 (d, *J* = 8.1 Hz, 1H), 7.45 – 7.41 (m, 2H), 7.38 – 7.33 (m, 2H), 7.26 – 7.24 (m, 2H), 7.17 (t, *J* = 7.6 Hz, 1H), 4.45 (t, *J* = 8.1 Hz, 2H), 3.42 (t, *J* = 8.1 Hz, 2H), 2.69 – 2.61 (m, 2H), 1.65 – 1.49 (m, 2H), 0.86 (t, *J* = 7.4 Hz, 3H); <sup>13</sup>C NMR (101 MHz, CDCl<sub>3</sub>) δ 160.49, 146.74, 141.65, 136.39, 133.61, 130.85, 129.90 × 2, 128.16 × 2, 127.34, 124.50, 122.84, 121.72, 117.90, 46.97, 31.61, 27.11, 23.41, 14.36; HRMS (ESI): *m/z* calculated for [C<sub>20</sub>H<sub>20</sub>NO]<sup>+</sup> [*M* + *H*]<sup>+</sup>: 290.1545, Found: 290.1542; FTIR (NaCl): ν 2962, 2929, 1633, 1614, 1606, 1462, 1404, 1346, 1292 cm<sup>-1</sup>

#### 5,6-Diethyl-1H-pyrrolo[3,2,1-*ij*]quinolin-4(2H)-one (**3l**)

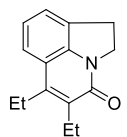

Following the general reaction procedure B, **3l** was obtained as a white solid (14.0 mg, 0.06 mmol, Yield: 44%); m.p. = 116-118 °C; <sup>1</sup>H NMR (400 MHz, CDCl<sub>3</sub>) δ 7.45 (d, *J* = 8.1 Hz, 1H), 7.30 – 7.24 (m, 1H), 7.13 (t, *J* = 7.4 Hz, 1H), 4.46 – 4.39 (t, *J* = 8.1 Hz, 2H), 3.39 (t, *J* = 8.1 Hz, 2H), 2.89 (q, *J* = 7.6 Hz, 2H), 2.76 (q, *J* = 7.6 Hz, 2H), 1.26 (t, *J* = 7.6 Hz, 3H), 1.18 (t, *J* = 7.6 Hz, 3H); <sup>13</sup>C NMR (101 MHz, CDCl<sub>3</sub>) δ 160.89, 145.91, 140.91, 133.81, 130.65, 123.64, 122.73, 120.83, 117.87, 46.79, 27.10, 21.56, 20.32, 14.28, 13.92; HRMS (ESI): *m/z* calculated for [C<sub>15</sub>H<sub>18</sub>NO]<sup>+</sup> [*M* + *H*]<sup>+</sup>: 228.1388, Found: 228.1391; FTIR (NaCl): ν 2986, 2933, 1637, 1606, 1487, 1265, 1051 cm<sup>-1</sup>

#### 6-(4-Bromophenyl)-5-(4-methoxyphenyl)-1H-pyrrolo[3,2,1-*ij*]quinolin-4(2H)-one (**3m**)

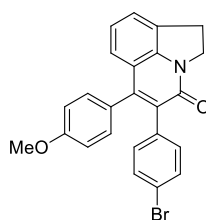

Following the general reaction procedure A, **3m** was obtained as a yellow solid (19.3 mg, 0.04 mmol, Yield: 32%); m.p. = 219-221 °C; <sup>1</sup>H NMR (400 MHz, CDCl<sub>3</sub>) δ 7.36 (d, *J* = 7.3 Hz, 1H), 7.31 (d, *J* = 8.6 Hz, 2H), 7.16 (d, *J* = 7.3 Hz,

1H), 7.09 (t,  $J = 7.3$  Hz, 1H), 7.03 (d,  $J = 8.5$  Hz, 2H), 7.01 (d,  $J = 8.6$  Hz, 2H), 6.83 (d,  $J = 8.5$  Hz, 2H), 4.53 (t,  $J = 7.8$  Hz, 2H), 3.81 (s, 3H), 3.48 (t,  $J = 7.8$  Hz, 2H);  $^{13}\text{C}$  NMR (101 MHz,  $\text{CDCl}_3$ )  $\delta$  160.10, 159.09, 147.11, 141.74, 134.73, 132.81  $\times$  2, 132.00, 131.05  $\times$  2, 130.72  $\times$  2, 130.54, 127.80, 125.01, 123.84, 123.14, 121.10, 118.72, 113.71  $\times$  2, 55.21, 47.38, 27.19; HRMS (ESI):  $m/z$  calculated for  $[\text{C}_{24}\text{H}_{19}\text{BrNO}_2]^+ [\text{M} + \text{H}]^+$ : 432.0599, Found: 432.0586; FTIR (NaCl):  $\nu$  2958, 2929, 1639, 1604, 1512, 1406, 1290, 1265, 1247, 1176, 1033, 1010  $\text{cm}^{-1}$

#### 2,6-Dimethyl-5-phenyl-1H-pyrrolo[3,2,1-*ij*]quinolin-4(2H)-one (4a)

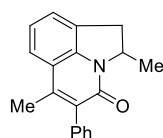

Following the general reaction procedure B, **4a** was obtained as a white solid (20.8 mg, 0.08 mmol, Yield: 54%); m.p. = 137-139  $^{\circ}\text{C}$ ;  $^1\text{H}$  NMR (400 MHz,  $\text{CDCl}_3$ )  $\delta$  7.51 (dd,  $J = 8.0, 0.6$  Hz, 1H), 7.45 – 7.42 (m, 2H), 7.39 – 7.27 (m, 4H), 7.21 – 7.16 (m, 1H), 5.11 – 5.01 (m, 1H), 3.64 (dd,  $J = 16.7, 9.4$  Hz, 1H), 3.00 (dd,  $J = 16.7, 3.8$  Hz, 1H), 2.31 (s, 3H), 1.62 (d,  $J = 6.4$  Hz, 3H);  $^{13}\text{C}$  NMR (101 MHz,  $\text{CDCl}_3$ )  $\delta$  160.19, 142.09, 140.58, 136.34, 134.19, 130.27  $\times$  2, 129.16, 128.10  $\times$  2, 127.35, 124.73, 122.91, 121.59, 118.72, 56.87, 36.32, 20.60, 16.11; HRMS (ESI):  $m/z$  calculated for  $[\text{C}_{19}\text{H}_{18}\text{NO}]^+ [\text{M} + \text{H}]^+$ : 276.1388, Found: 276.1397; FTIR (NaCl):  $\nu$  3053, 2960, 2926, 1637, 1616, 1608, 1458, 1404, 1265, 1010  $\text{cm}^{-1}$

#### 2-Methyl-5,6-diphenyl-1H-pyrrolo[3,2,1-*ij*]quinolin-4(2H)-one (4b)

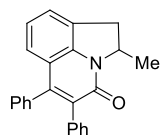

Following the general reaction procedure A, **4b** was obtained as a white solid (29.7 mg, 0.09 mmol, Yield: 63%); m.p. = 235-237  $^{\circ}\text{C}$ ;  $^1\text{H}$  NMR (400 MHz,  $\text{CDCl}_3$ )  $\delta$  7.33 – 7.29 (m, 2H), 7.27 – 7.20 (m, 3H), 7.19 – 6.99 (m, 8H), 5.26 – 5.08 (m, 1H), 3.69 (dd,  $J = 16.7, 9.4$  Hz, 1H), 3.05 (dd,  $J = 16.7, 3.8$  Hz, 1H), 1.69 (d,  $J = 6.4$  Hz, 3H);  $^{13}\text{C}$  NMR (101 MHz,  $\text{CDCl}_3$ )  $\delta$  160.26, 146.89, 141.08, 136.08, 135.57, 133.87, 131.04  $\times$  2, 129.84, 129.82, 129.04, 128.09, 127.89, 127.54, 127.43  $\times$  2, 126.87, 124.89, 123.78, 122.98, 118.47, 57.22, 36.36, 20.62; HRMS (ESI):  $m/z$  calculated for  $[\text{C}_{24}\text{H}_{20}\text{NO}]^+ [\text{M} + \text{H}]^+$ : 338.1545, Found: 338.1546; FTIR (NaCl):  $\nu$  2924, 1639, 1618, 1438, 1298, 1265  $\text{cm}^{-1}$

#### 1,6-Dimethyl-5-phenyl-1H-pyrrolo[3,2,1-*ij*]quinolin-4(2H)-one (4c)

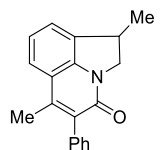

Following the general reaction procedure B, **4c** was obtained as a white solid (25.0 mg, 0.09 mmol, Yield: 65%); m.p. = 134-136  $^{\circ}\text{C}$ ;  $^1\text{H}$  NMR (400 MHz,  $\text{CDCl}_3$ )  $\delta$  7.52 (d,  $J = 8.0$  Hz, 1H), 7.45 – 7.42 (m, 2H), 7.37 – 7.33 (m, 2H), 7.31 – 7.18 (m, 3H), 4.62 (dd,  $J = 12.7, 9.4$  Hz, 1H), 4.00 (dd,  $J = 12.7, 5.5$  Hz, 1H), 3.79 – 3.75 (m, 1H), 2.31 (s, 3H), 1.48 (d,  $J = 7.0$  Hz, 3H);  $^{13}\text{C}$  NMR (101 MHz,  $\text{CDCl}_3$ )  $\delta$  160.23, 142.26, 140.59, 136.31, 135.77, 133.82, 130.19  $\times$  2, 128.13  $\times$  2, 127.41, 123.69, 123.03, 121.77, 118.76, 55.02, 34.73, 20.82, 16.14; HRMS (ESI):  $m/z$  calculated for  $[\text{C}_{19}\text{H}_{18}\text{NO}]^+ [\text{M} + \text{H}]^+$ : 276.1388, Found: 276.1391; FTIR (NaCl):  $\nu$  3053, 2964, 2926, 1639, 1616, 1608, 1456, 1265  $\text{cm}^{-1}$

#### 1-Methyl-5,6-diphenyl-1H-pyrrolo[3,2,1-*ij*]quinolin-4(2H)-one (4d)

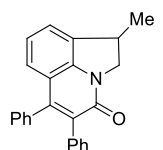

Following the general reaction procedure A, **4d** was obtained as a white solid (25.5 mg, 0.08 mmol, Yield: 54%); m.p. = 181-183  $^{\circ}\text{C}$ ;  $^1\text{H}$  NMR (400 MHz,  $\text{CDCl}_3$ )  $\delta$  7.33 (d,  $J = 6.6$  Hz, 1H), 7.29 – 7.24 (m, 3H), 7.19 – 7.05 (m, 9H), 4.71 (dd,  $J = 12.8, 9.4$  Hz, 1H), 4.09 (dd,  $J = 12.8, 5.5$  Hz, 1H), 3.87 – 3.82 (m, 1H), 1.52 (d,  $J = 7.0$  Hz, 3H);  $^{13}\text{C}$  NMR (101 MHz,  $\text{CDCl}_3$ )  $\delta$  160.27, 147.02, 141.06, 136.00, 135.61, 135.53, 133.49, 130.94  $\times$  2, 129.77  $\times$  2, 127.97  $\times$  2, 127.54, 127.42  $\times$  2, 126.89, 123.88, 123.83, 123.08, 118.47, 55.31, 34.78, 20.83;



HRMS (ESI):  $m/z$  calculated for  $[C_{24}H_{20}NO]^+ [M + H]^+$ : 338.1545, Found: 338.1540; FTIR (NaCl):  $\nu$  3055, 2964, 2926, 1641, 1616, 1602, 1456, 1317, 1265, 1024  $cm^{-1}$

**6,9-Dimethyl-5-phenyl-1H-pyrrolo[3,2,1-*ij*]quinolin-4(2H)-one (4e)**

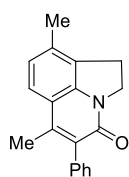

Following the general reaction procedure B, **4e** was obtained as a white solid (28.9 mg, 0.11 mmol, Yield: 75%); m.p. = 168-170 °C;  $^1H$  NMR (400 MHz,  $CDCl_3$ )  $\delta$  7.45 – 7.38 (m, 3H), 7.37 – 7.34 (m, 1H), 7.31 – 7.25 (m, 2H), 7.01 (d,  $J$  = 8.2 Hz, 1H), 4.45 (d,  $J$  = 8.1 Hz, 2H), 3.32 (d,  $J$  = 8.1 Hz, 2H), 2.38 (s, 3H), 2.28 (s, 3H);  $^{13}C$  NMR (101 MHz,  $CDCl_3$ )  $\delta$  160.45, 142.23, 141.02, 136.38, 134.95, 132.44, 130.28  $\times$  2, 128.68, 128.05  $\times$  2, 127.26, 124.60, 121.68, 116.76, 47.06, 26.18, 18.50, 16.04; HRMS (ESI):  $m/z$  calculated for  $[C_{19}H_{18}NO]^+ [M + H]^+$ : 276.1388, Found: 276.1382; FTIR (NaCl):  $\nu$  3055, 2924, 1645, 1616, 1456, 1340, 1265  $cm^{-1}$

**9-Methyl-5,6-diphenyl-1H-pyrrolo[3,2,1-*ij*]quinolin-4(2H)-one (4f)**

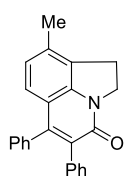

Following the general reaction procedure A, **4f** was obtained as a white solid (31.1 mg, 0.09 mmol, Yield: 66%); m.p. = 205-207 °C;  $^1H$  NMR (400 MHz,  $CDCl_3$ )  $\delta$  7.29 – 7.23 (m, 3H), 7.17 – 7.08 (m, 7H), 7.02 (d,  $J$  = 8.2 Hz, 1H), 6.89 (d,  $J$  = 8.2 Hz, 1H), 4.54 (t,  $J$  = 8.1 Hz, 2H), 3.37 (t,  $J$  = 8.1 Hz, 2H), 2.37 (s, 3H);  $^{13}C$  NMR (101 MHz,  $CDCl_3$ )  $\delta$  160.48, 146.95, 141.55, 136.14, 135.61, 135.19, 132.14, 131.02  $\times$  2, 129.75  $\times$  2, 128.55, 127.91  $\times$  2, 127.45, 127.36  $\times$  2, 126.75, 124.68, 123.80, 116.47, 47.36, 26.25, 18.53; HRMS (ESI):  $m/z$  calculated for  $[C_{24}H_{20}NO]^+ [M + H]^+$ : 338.1545, Found: 338.1543; FTIR (NaCl):  $\nu$  3051, 2983, 1635, 1610, 1419, 1338, 1265  $cm^{-1}$

**9-Bromo-6-methyl-5-phenyl-1H-pyrrolo[3,2,1-*ij*]quinolin-4(2H)-one (4g)**

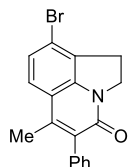

Following the general reaction procedure B, **4g** was obtained as a white solid (23.3 mg, 0.07 mmol, Yield: 49%); m.p. = 212-214 °C;  $^1H$  NMR (400 MHz,  $CDCl_3$ )  $\delta$  7.47 – 7.41 (m, 2H), 7.39 – 7.38 (m, 2H), 7.29 (d,  $J$  = 6.7 Hz, 1H), 7.27 (d,  $J$  = 6.7 Hz, 2H), 4.47 (d,  $J$  = 8.0 Hz, 2H), 3.40 (d,  $J$  = 8.0 Hz, 2H), 2.29 (s, 3H);  $^{13}C$  NMR (101 MHz,  $CDCl_3$ )  $\delta$  160.33, 141.98, 141.77, 135.90, 133.76, 131.05, 130.11  $\times$  2, 128.19  $\times$  2, 127.59, 125.86, 123.50, 119.28, 117.65, 46.63, 28.59, 16.17; HRMS (ESI):  $m/z$  calculated for  $[C_{18}H_{15}BrNO]^+ [M + H]^+$ : 340.0337, Found: 340.0335; FTIR (NaCl):  $\nu$  3053, 2982, 1639, 1620, 1595, 1394, 1338, 1265, 1010  $cm^{-1}$

**9-Bromo-5,6-diphenyl-1H-pyrrolo[3,2,1-*ij*]quinolin-4(2H)-one (4h)**

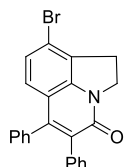

Following the general reaction procedure A, **4h** was obtained as a white solid (32.6 mg, 0.08 mmol, Yield: 58%); m.p. = 173-175 °C;  $^1H$  NMR (400 MHz,  $CDCl_3$ )  $\delta$  7.30 – 7.28 (m, 3H), 7.19 – 7.17 (m, 3H), 7.16 – 7.08 (m, 5H), 7.01 (d,  $J$  = 8.6 Hz, 1H), 4.59 (t,  $J$  = 8.0 Hz, 2H), 3.46 (t,  $J$  = 8.0 Hz, 2H);  $^{13}C$  NMR (101 MHz,  $CDCl_3$ )  $\delta$  160.35, 146.68, 142.16, 135.58, 135.13, 133.37, 130.91, 130.84  $\times$  2, 129.67  $\times$  2, 128.10  $\times$  2, 127.76, 127.47  $\times$  2, 127.06, 125.92, 125.58, 119.53, 117.35, 46.91, 28.62.; HRMS (ESI):  $m/z$  calculated for  $[C_{23}H_{17}BrNO]^+ [M + H]^+$ : 402.0494, Found: 402.0488; FTIR (NaCl):  $\nu$  3053, 2981, 1643, 1616, 1593, 1338, 1265, 1114, 1008  $cm^{-1}$

**9-Bromo-6-methyl-5-(naphthalen-2-yl)-1H-pyrrolo[3,2,1-*ij*]quinolin-4(2H)-one (4i)**

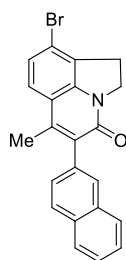

Following the general reaction procedure B, **4i** was obtained as a white solid (20.5 mg, 0.05 mmol, Yield: 48%); m.p. = 204-206 °C; <sup>1</sup>H NMR (400 MHz, CDCl<sub>3</sub>) δ 7.91 (d, *J* = 8.4 Hz, 1H), 7.89 – 7.80 (m, 2H), 7.74 (s, 1H), 7.54 – 7.44 (m, 2H), 7.41 – 7.38 (m, 2H), 7.30 (d, *J* = 8.4 Hz, 1H), 4.48 (t, *J* = 8.0 Hz, 2H), 3.39 (t, *J* = 8.0 Hz, 2H), 2.32 (s, 3H); <sup>13</sup>C NMR (101 MHz, CDCl<sub>3</sub>) δ 160.41, 142.34, 141.80, 133.62, 133.50, 133.27, 132.81, 131.08, 129.25, 128.10, 128.07, 127.72, 127.67, 126.04, 125.92 × 2, 123.52, 119.36, 117.68, 46.65, 28.60, 16.26; HRMS (ESI): *m/z* calculated for [C<sub>22</sub>H<sub>17</sub>BrNO]<sup>+</sup> [M + H]<sup>+</sup>: 390.0494, Found: 390.0490; FTIR (NaCl): ν 3053, 2985, 1635, 1614, 1595, 1421, 1396, 1336, 1265, 896 cm<sup>-1</sup>

#### 8-Bromo-6-methyl-5-phenyl-1H-pyrrolo[3,2,1-*ij*]quinolin-4(2H)-one (**4j**)

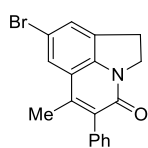

Following the general reaction procedure B, **4j** was obtained as a white solid (32.3 mg, 0.10 mmol, Yield: 68%); m.p. = 174-176 °C; <sup>1</sup>H NMR (400 MHz, CDCl<sub>3</sub>) δ 7.64 (s, 1H), 7.46 – 7.42 (m, 3H), 7.38 – 7.37 (m, 1H), 7.27 – 7.25 (m, 2H), 4.45 (t, *J* = 8.0 Hz, 2H), 3.42 (t, *J* = 8.0 Hz, 2H), 2.27 (s, 3H); <sup>13</sup>C NMR (101 MHz, CDCl<sub>3</sub>) δ 159.97, 141.23, 140.14, 135.77, 134.63, 132.62, 130.07 × 2, 128.19 × 2, 127.81, 127.65, 124.31, 119.88, 115.56, 47.20, 26.96, 16.11; HRMS (ESI): *m/z* calculated for [C<sub>18</sub>H<sub>15</sub>BrNO]<sup>+</sup> [M + H]<sup>+</sup>: 340.0337, Found: 340.0340; FTIR (NaCl): ν 3055, 2924, 1643, 1633, 1614, 1483, 1435, 1357, 1263, 856 cm<sup>-1</sup>

#### 8-Bromo-5,6-diphenyl-1H-pyrrolo[3,2,1-*ij*]quinolin-4(2H)-one (**4k**)

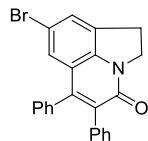

Following the general reaction procedure A, **4k** was obtained as a white solid (42.7 mg, 0.11 mmol, Yield: 76%); m.p. = 220-222 °C; <sup>1</sup>H NMR (400 MHz, CDCl<sub>3</sub>) δ 7.50 – 7.20 (m, 5H), 7.14 – 7.07 (m, 7H), 4.54 (d, *J* = 7.9 Hz, 2H), 3.47 (t, *J* = 7.9 Hz, 2H); <sup>13</sup>C NMR (101 MHz, CDCl<sub>3</sub>) δ 159.98, 145.94, 140.62, 135.26, 135.04, 134.34, 132.51, 130.80 × 2, 129.63 × 2, 128.19 × 2, 128.00, 127.85, 127.46 × 2, 127.11, 126.01, 119.56, 115.65, 47.48, 26.96; HRMS (ESI): *m/z* calculated for [C<sub>23</sub>H<sub>17</sub>BrNO]<sup>+</sup> [M + H]<sup>+</sup>: 402.0494, Found: 402.0505; FTIR (NaCl): ν 3053, 2926, 1643, 1618, 1458, 1336, 1265, 1072, 867 cm<sup>-1</sup>

#### 8-Bromo-5,6-bis(4-bromophenyl)-1H-pyrrolo[3,2,1-*ij*]quinolin-4(2H)-one (**4l**)

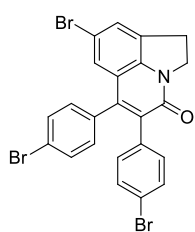

Following the general reaction procedure A, **4l** was obtained as a white solid (47.6 mg, 0.09 mmol, Yield: 61%); m.p. = 280-282 °C; <sup>1</sup>H NMR (400 MHz, CDCl<sub>3</sub>) δ 7.47 – 7.45 (m, 3H), 7.33 (d, *J* = 8.3 Hz, 2H), 7.17 (s, 1H), 6.97 (d, *J* = 8.2 Hz, 2H), 6.97 (d, *J* = 8.2 Hz, 2H), 4.52 (t, *J* = 8.0 Hz, 2H), 3.47 (t, *J* = 8.0 Hz, 2H); <sup>13</sup>C NMR (101 MHz, CDCl<sub>3</sub>) δ 159.42, 144.86, 140.68, 133.88, 133.66, 133.25, 132.69, 132.46 × 2, 131.78 × 2, 131.18 × 2, 130.94 × 2, 128.48, 125.72, 122.48, 121.73, 119.00, 115.97, 47.56, 26.95; HRMS (ESI): *m/z* calculated for [C<sub>23</sub>H<sub>15</sub>Br<sub>3</sub>NO]<sup>+</sup> [M + H]<sup>+</sup>: 557.8704, Found: 557.8721; FTIR (NaCl): ν 3053, 2985, 1645, 1616, 1489, 1419, 1265, 1070, 894 cm<sup>-1</sup>

#### 8-Bromo-6-methyl-5-(naphthalen-2-yl)-1H-pyrrolo[3,2,1-*ij*]quinolin-4(2H)-one (**4m**)

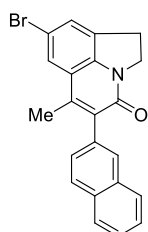

Following the general reaction procedure B, **4m** was obtained as a white solid (32.1 mg, 0.08 mmol, Yield: 59%); m.p. = 189-191 °C; <sup>1</sup>H NMR (400 MHz, CDCl<sub>3</sub>) δ 7.91 (d, *J* = 8.4 Hz, 1H), 7.89 – 7.80 (m, 2H), 7.74 (s, 1H), 7.67 (s, 1H), 7.52 – 7.45 (m, 3H), 7.42 – 7.38 (m, 1H), 4.48 (t, *J* = 8.0 Hz, 2H), 3.44 (t, *J* = 8.0 Hz, 2H), 2.31 (s, 3H); <sup>13</sup>C NMR (101 MHz, CDCl<sub>3</sub>) δ 160.09, 141.57, 140.25, 134.61, 133.41, 133.28, 132.87,

132.67, 129.27, 128.11, 128.06, 127.92, 127.77, 127.70, 126.12, 125.97, 124.38, 119.97, 115.65, 47.25, 27.02, 16.23; HRMS (ESI):  $m/z$  calculated for  $[C_{22}H_{17}BrNO]^+$   $[M + H]^+$ : 390.0494, Found: 390.0479; FTIR (NaCl):  $\nu$  3053, 2980, 2856, 1645, 1635, 1487, 1265, 1116, 819  $cm^{-1}$

#### 8-Chloro-6-methyl-5-phenyl-1H-pyrrolo[3,2,1-*ij*]quinolin-4(2H)-one (4n)

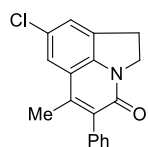

Following the general reaction procedure B, **4n** was obtained as a white solid (22.7 mg, 0.08 mmol, Yield: 55%); m.p. = 257-259 °C;  $^1H$  NMR (400 MHz,  $CDCl_3$ )  $\delta$  7.49 (s, 1H), 7.44 – 7.42 (m, 2H), 7.38 – 7.35 (m, 1H), 7.31 (s, 1H), 7.28 – 7.26 (m, 2H), 4.47 (t,  $J$  = 7.6 Hz, 2H), 3.42 (t,  $J$  = 7.6 Hz, 2H), 2.27 (s, 3H);  $^{13}C$  NMR (101 MHz,  $CDCl_3$ )  $\delta$  160.00, 141.27, 139.82, 135.82, 134.69, 132.31, 130.09  $\times$  2, 128.28, 128.19  $\times$  2, 127.65, 125.20, 121.30, 119.30, 47.26, 27.03, 16.12; HRMS (ESI):  $m/z$  calculated for  $[C_{18}H_{15}ClNO]^+$   $[M + H]^+$ : 296.0842, Found: 296.0839; FTIR (NaCl):  $\nu$  3053, 2924, 1639, 1620, 1959, 1483, 1338, 1265, 1010, 869  $cm^{-1}$

#### 8-Fluoro-6-methyl-5-phenyl-1H-pyrrolo[3,2,1-*ij*]quinolin-4(2H)-one (4o)

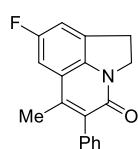

Following the general reaction procedure B, **4o** was obtained as a white solid (16.8 mg, 0.06 mmol, Yield: 43%); m.p. = 166-168 °C;  $^1H$  NMR (400 MHz,  $CDCl_3$ )  $\delta$  7.46 – 7.42 (m, 2H), 7.37 (d,  $J$  = 7.2 Hz, 1H), 7.28 (d,  $J$  = 1.5 Hz, 1H), 7.26 (d,  $J$  = 1.5 Hz, 1H), 7.17 (d,  $J$  = 10.1 Hz, 1H), 7.12 (d,  $J$  = 8.3 Hz, 1H), 4.48 (t,  $J$  = 8.0 Hz, 2H), 3.43 (t,  $J$  = 8.0 Hz, 2H), 2.26 (s, 3H);  $^{13}C$  NMR (101 MHz,  $CDCl_3$ )  $\delta$  159.87, 159.42 (d,  $J$  = 241.4 Hz), 141.48, 137.64, 135.96, 134.72, 132.35 (d,  $J$  = 9.1 Hz), 130.07  $\times$  2, 128.16  $\times$  2, 127.59, 118.73 (d,  $J$  = 9.8 Hz), 113.65 (d,  $J$  = 26.8 Hz), 107.0 (d,  $J$  = 24.9 Hz), 47.31, 27.15 (d,  $J$  = 1.8 Hz), 16.21;  $^{19}F$  NMR (376 MHz,  $CDCl_3$ )  $\delta$  -119.06; HRMS (ESI):  $m/z$  calculated for  $[C_{18}H_{15}FNO]^+$   $[M + H]^+$ : 280.1138, Found: 280.1142; FTIR (NaCl):  $\nu$  2956, 2922, 2852, 1645, 1616, 1487, 1396, 1267, 1168, 943  $cm^{-1}$

#### 8-Fluoro-5,6-diphenyl-1H-pyrrolo[3,2,1-*ij*]quinolin-4(2H)-one (4p)

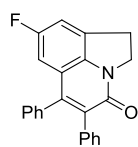

Following the general reaction procedure A, **4p** was obtained as a white solid (29.1 mg, 0.09 mmol, Yield: 61%); m.p. = 202-204 °C;  $^1H$  NMR (400 MHz,  $CDCl_3$ )  $\delta$  7.37 – 7.23 (m, 3H), 7.21 – 7.03 (m, 8H), 6.79 (dd,  $J$  = 10.2, 2.0 Hz, 1H), 4.63 – 4.50 (t,  $J$  = 8.0 Hz, 2H), 3.48 (t,  $J$  = 8.0 Hz, 2H);  $^{13}C$  NMR (101 MHz,  $CDCl_3$ )  $\delta$  159.94, 159.37 (d,  $J$  = 241.4 Hz), 146.27 (d,  $J$  = 3.4 Hz), 138.17, 135.60, 135.25, 134.42, 132.33 (d,  $J$  = 9.3 Hz), 130.88  $\times$  2, 129.64  $\times$  2, 128.20  $\times$  2, 127.83, 127.50  $\times$  2, 127.12, 118.45 (d,  $J$  = 9.5 Hz), 113.94 (d,  $J$  = 27.1 Hz), 108.90 (d,  $J$  = 25.7 Hz), 47.64, 27.22 (d,  $J$  = 1.4 Hz);  $^{19}F$  NMR (376 MHz,  $CDCl_3$ )  $\delta$  -118.85; HRMS (ESI):  $m/z$  calculated for  $[C_{23}H_{17}FNO]^+$   $[M + H]^+$ : 342.1294, Found: 342.1292; FTIR (NaCl):  $\nu$  3053, 2980, 2924, 1645, 1622, 1396, 1265, 1136, 864  $cm^{-1}$

#### 5,6-Diphenyl-4H-pyrrolo[3,2,1-*ij*]quinolin-4-one (5)

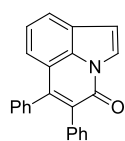

Following the general reaction procedure C, **5** was obtained as a yellow oil (37.4 mg, 0.11 mmol, Yield: 97%);  $^1H$  NMR (400 MHz,  $CDCl_3$ )  $\delta$  8.07 (d,  $J$  = 3.6 Hz, 1H), 7.85 (d,  $J$  = 7.3 Hz, 1H), 7.42 – 7.27 (m, 5H), 7.23 – 7.17 (m, 7H), 6.96 (d,  $J$  = 3.6 Hz, 1H);  $^{13}C$  NMR (101 MHz,  $CDCl_3$ )  $\delta$  159.04, 148.59, 135.38, 135.02, 133.44, 131.66, 131.00  $\times$  2, 130.07  $\times$  2, 127.88  $\times$  2, 127.85, 127.74, 127.62  $\times$  2, 127.27, 124.91, 124.71, 124.01, 123.97, 118.46, 110.84; HRMS (ESI):  $m/z$  calculated for  $[C_{23}H_{16}NO]^+$   $[M + H]^+$ : 322.1232, Found: 322.1236; FTIR (NaCl):  $\nu$  3053, 2987, 1666, 1633, 1444, 1384, 1300, 1265  $cm^{-1}$

**5,6-Diphenyl-2,4-dihydro-1H-pyrrolo[3,2,1-*ij*]quinolone (6)**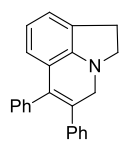

Following the general reaction procedure D, **6** was obtained as a yellow oil (16.7 mg, 0.05 mmol, Yield: 45%);  $^1\text{H}$  NMR (400 MHz, *d*-Acetone)  $\delta$  7.29 – 7.18 (m, 4H), 7.17 – 7.06 (m, 6H), 6.95 (dd,  $J = 7.5, 1.0$  Hz, 1H), 6.48 (t,  $J = 7.5$  Hz, 1H), 6.40 (d,  $J = 7.5$  Hz, 1H), 4.19 (s, 2H), 3.33 (t,  $J = 8.1$  Hz, 2H), 3.00 (t,  $J = 8.1$  Hz, 2H);  $^{13}\text{C}$  NMR (101 MHz,  $\text{CDCl}_3$ )  $\delta$  149.16, 140.56, 137.47, 134.02, 130.59  $\times$  2, 128.27  $\times$  2, 128.00, 127.97  $\times$  2, 127.75  $\times$  2, 126.96, 126.76, 126.53, 124.05, 123.11, 121.34, 118.79, 55.45, 55.20, 28.87; HRMS (ESI):  $m/z$  calculated for  $[\text{C}_{23}\text{H}_{20}\text{N}]^+$   $[\text{M} + \text{H}]^+$ : 310.1596, Found: 310.1602; FTIR (NaCl):  $\nu$  3054, 2925, 1647, 1446, 1261  $\text{cm}^{-1}$

**6-Methyl-5-phenyl-5,6-dihydro-1H-pyrrolo[3,2,1-*ij*]quinolin-4(2H)-one (7)**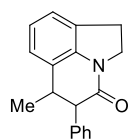

Following the general reaction procedure E, **7** was obtained as a white solid (16.4 mg, 0.06 mmol, Yield: 52%); m.p. = 158-160  $^{\circ}\text{C}$ ;  $^1\text{H}$  NMR (500 MHz,  $\text{CDCl}_3$ )  $\delta$  7.24 – 7.18 (m, 3H), 7.16 – 7.14 (m, 1H), 7.05 – 6.99 (m, 4H), 4.26 – 4.04 (m, 2H), 3.86 (d,  $J = 6.3$  Hz, 1H), 3.58 – 3.40 (m, 1H), 3.37 – 3.14 (m, 2H), 1.12 (d,  $J = 7.1$  Hz, 3H);  $^{13}\text{C}$  NMR (101 MHz,  $\text{CDCl}_3$ )  $\delta$  168.44, 140.77, 136.56, 129.06  $\times$  2, 128.47, 128.37  $\times$  2, 127.24, 125.09, 123.83, 123.78, 123.49, 54.26, 45.36, 35.58, 28.00, 14.50; HRMS (ESI):  $m/z$  calculated for  $[\text{C}_{18}\text{H}_{18}\text{NO}]^+$   $[\text{M} + \text{H}]^+$ : 264.1388, Found: 264.1383; FTIR (NaCl):  $\nu$  3030, 2918, 2848, 1668, 1593, 1471, 1394, 1338  $\text{cm}^{-1}$

1

## NMR spectra of products

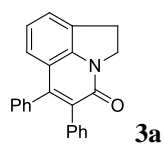

1198-10-2 CDCl<sub>3</sub> BBFO1 400 Apr

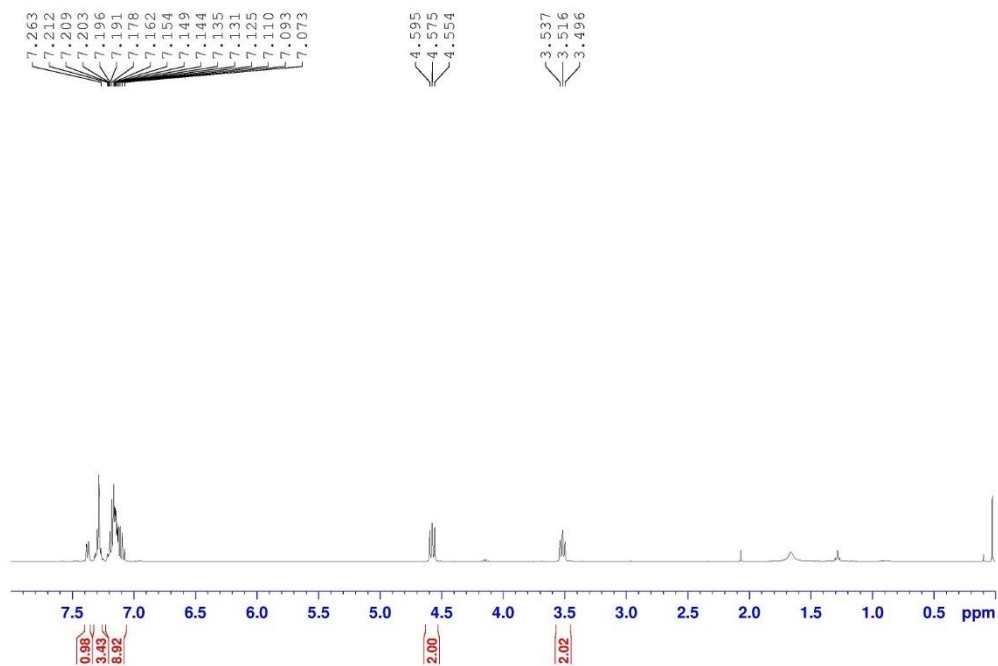

annula, 1H, CDCl<sub>3</sub>, 400MHz, AV400

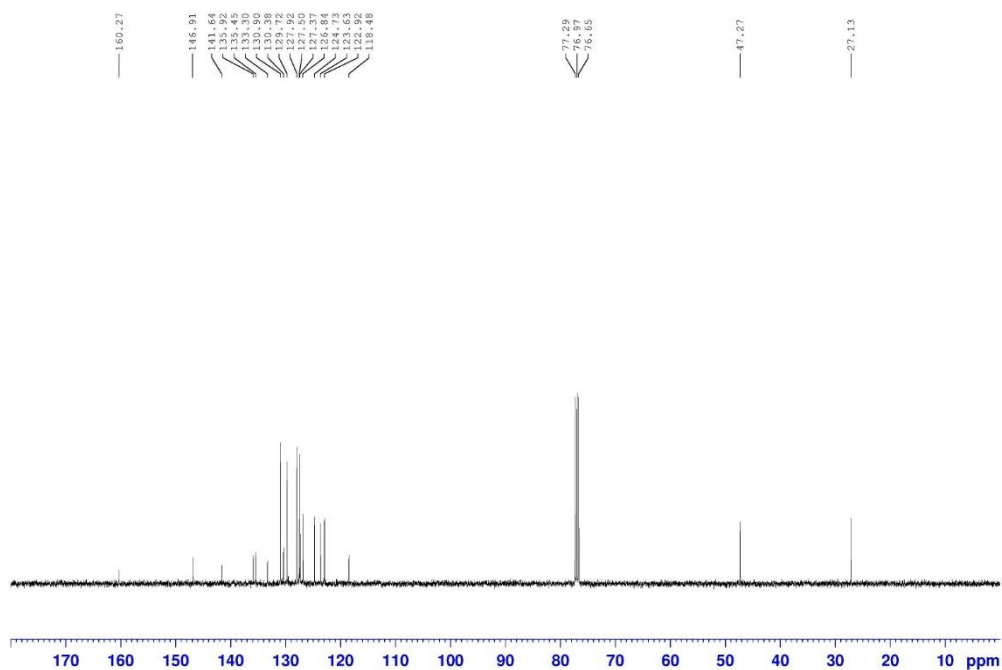

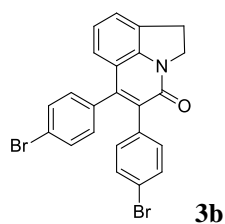

BBF01, 400, 2246-1

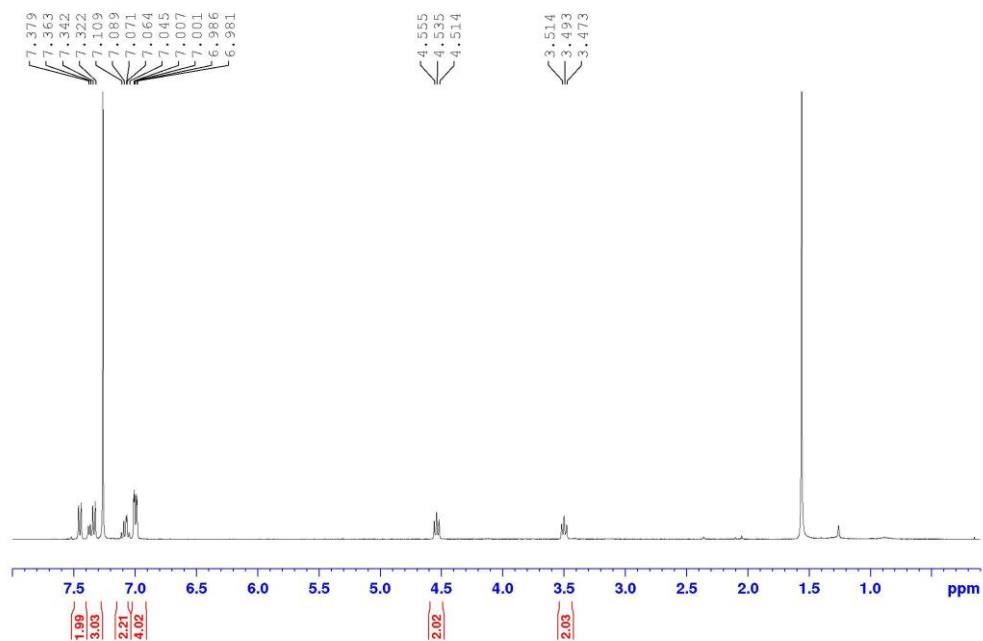

2246,1H CDC13 bbfol,

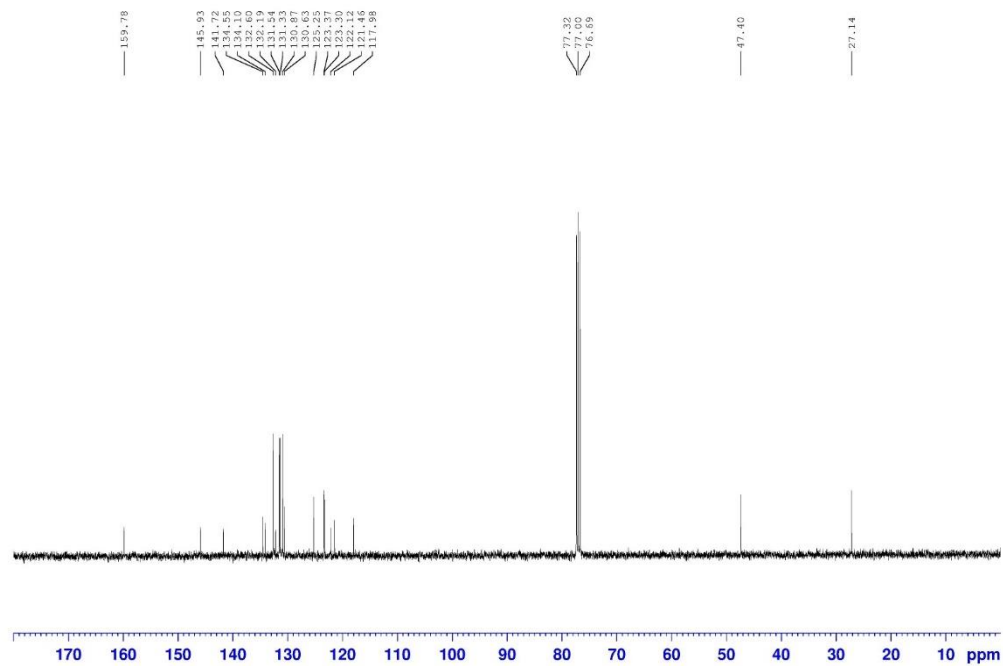

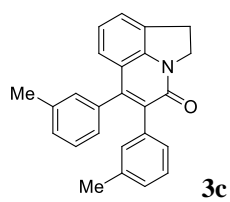

2244-2, AV 400MHz, Nov14

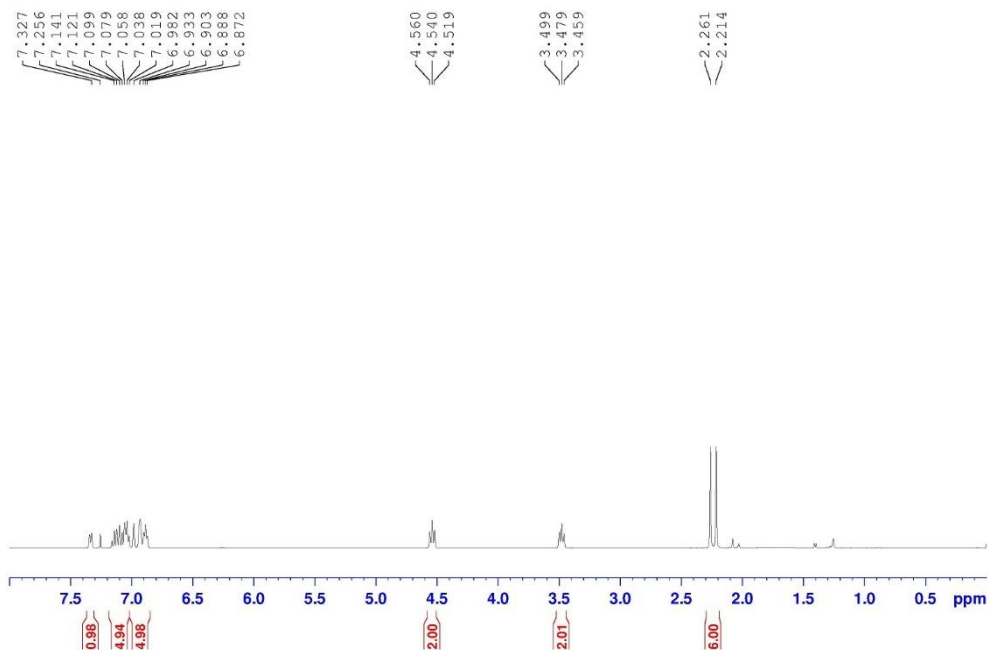

2244-2, AV 400MHz, Nov14

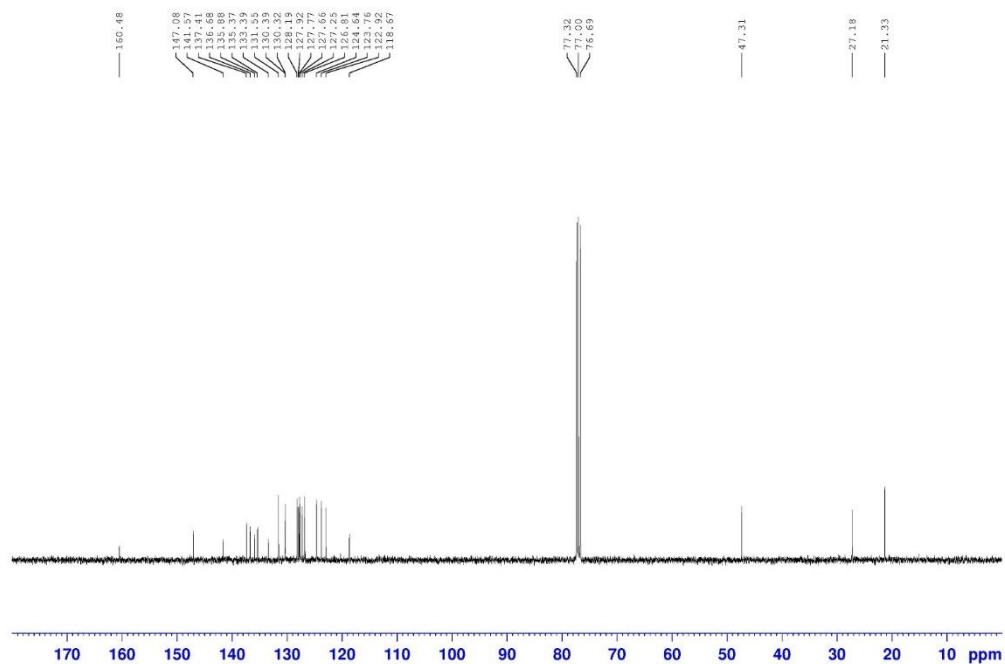

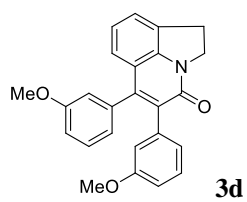

2244-2, AV 400MHz, Nov14

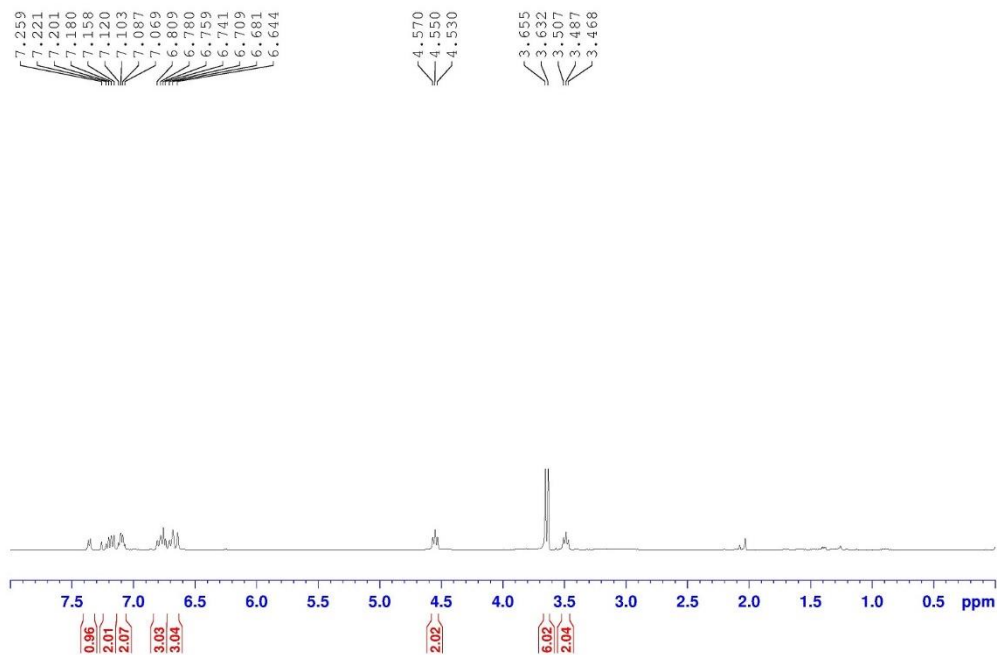

2244-2, AV 400MHz, Nov14

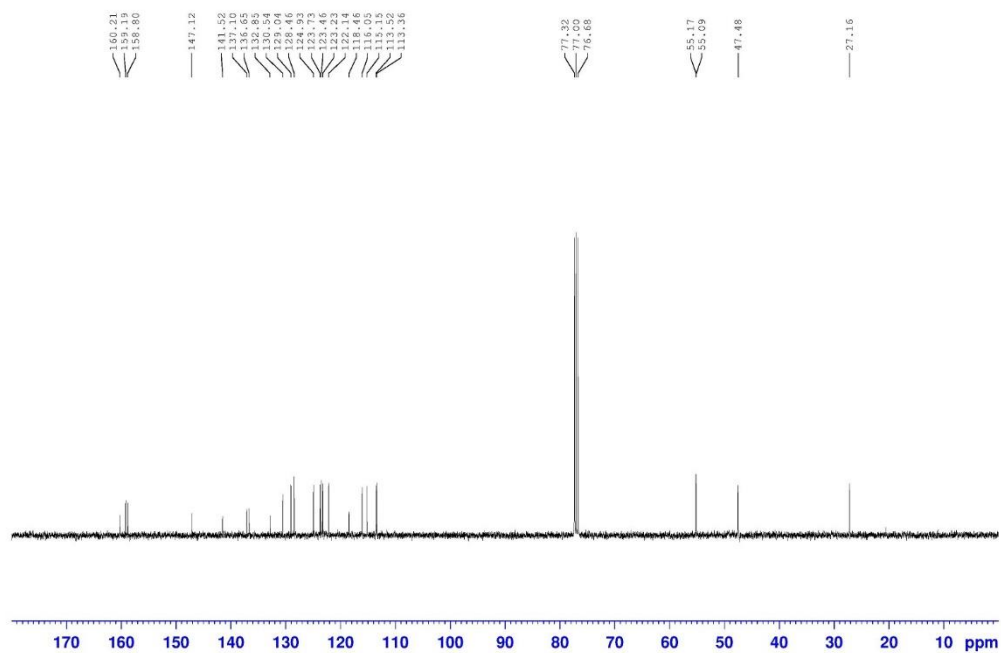



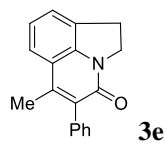

2008-10,BBF01, MAY 14

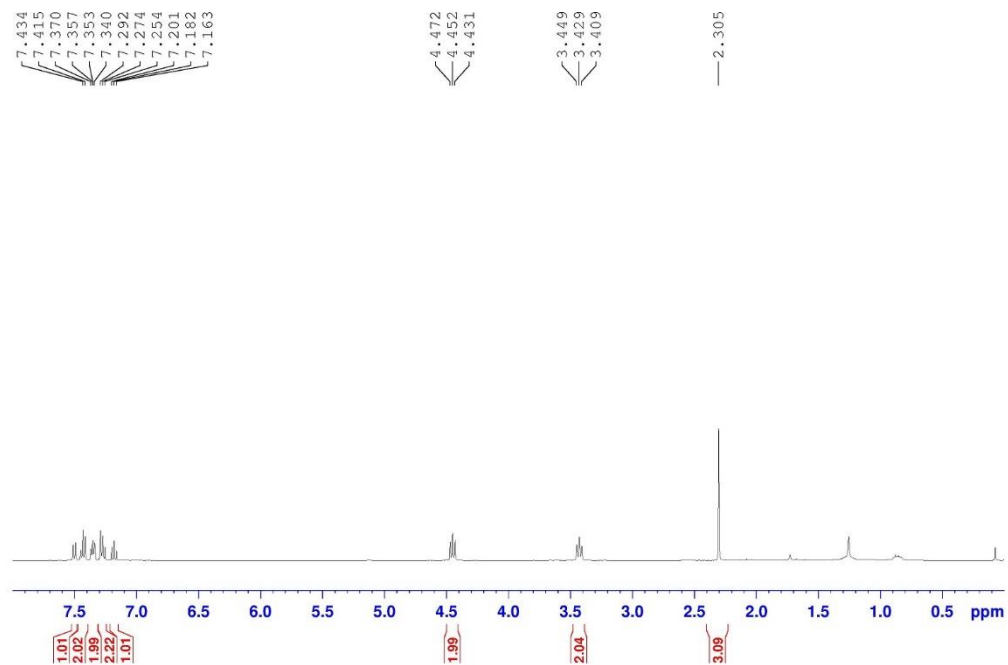

2008-10,BBF01, MAY 14

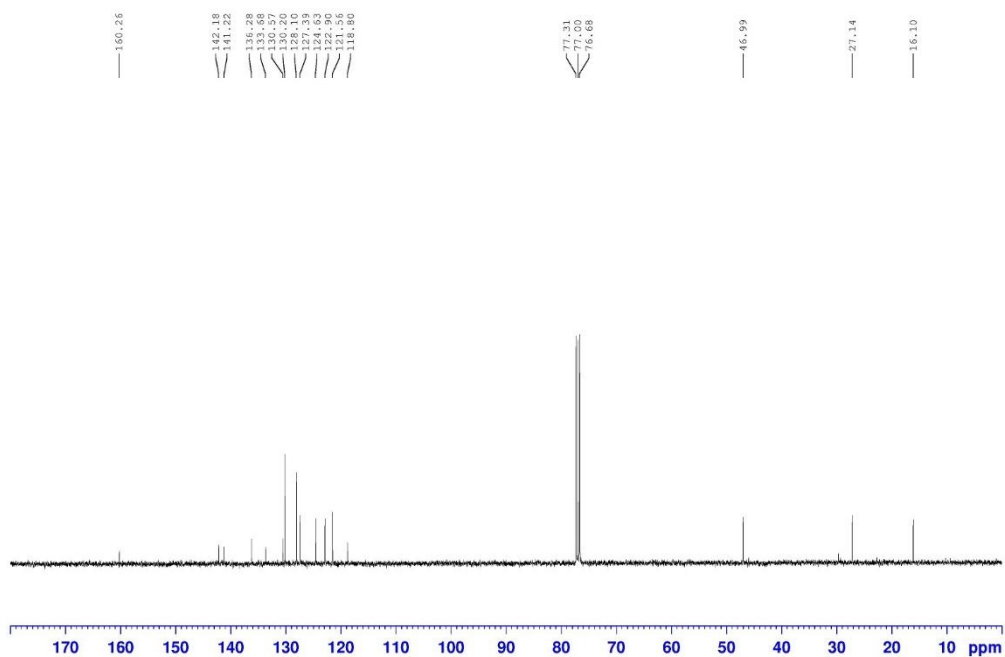

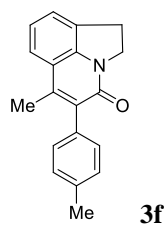

2054-20 BBFO 1

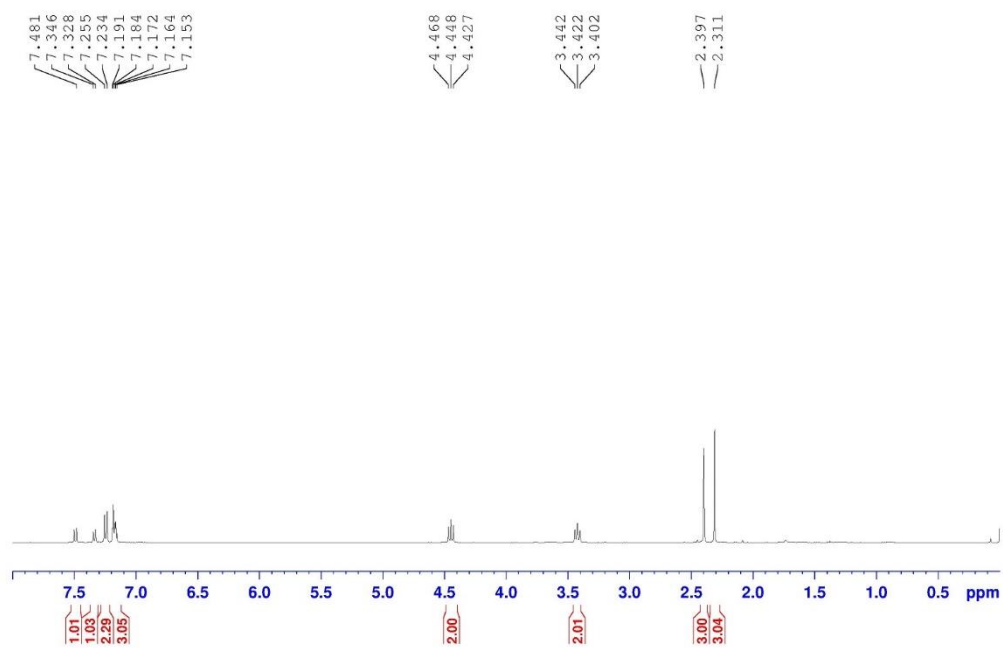

2054-20 BBFO 1

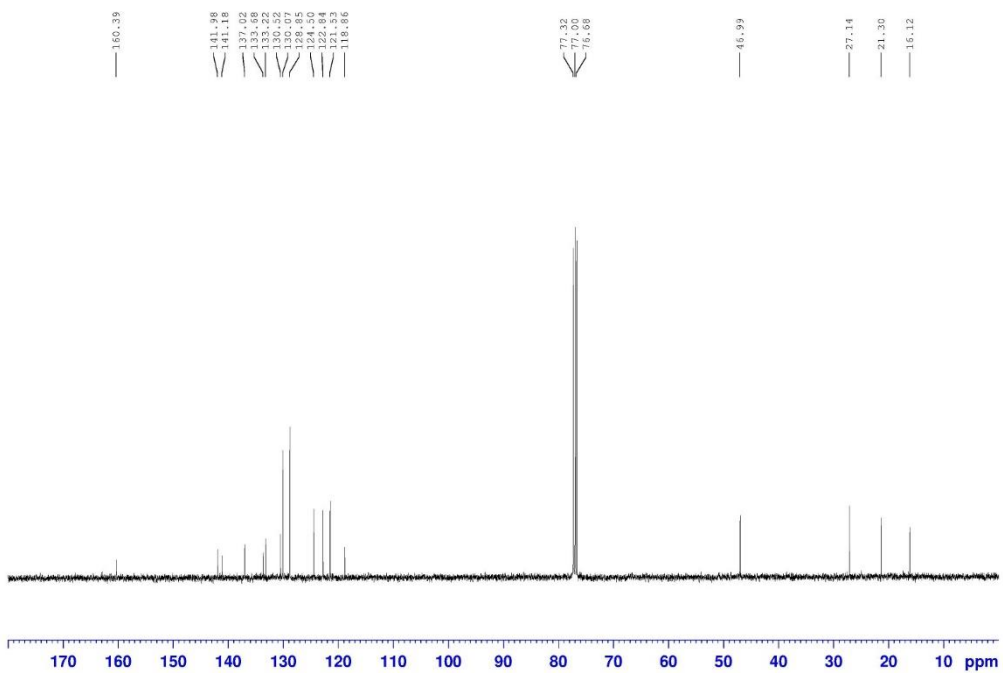

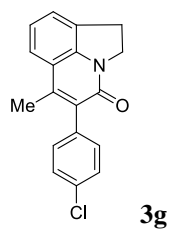

2056-20a BBFO 1

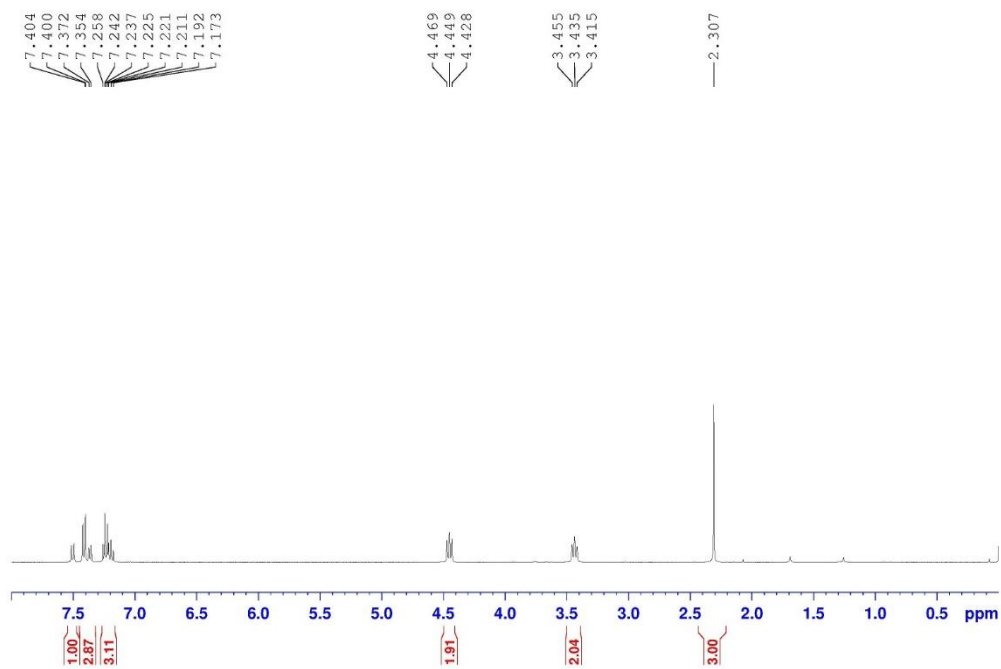

1bsC4-Me-ketone-XH BBFO 1

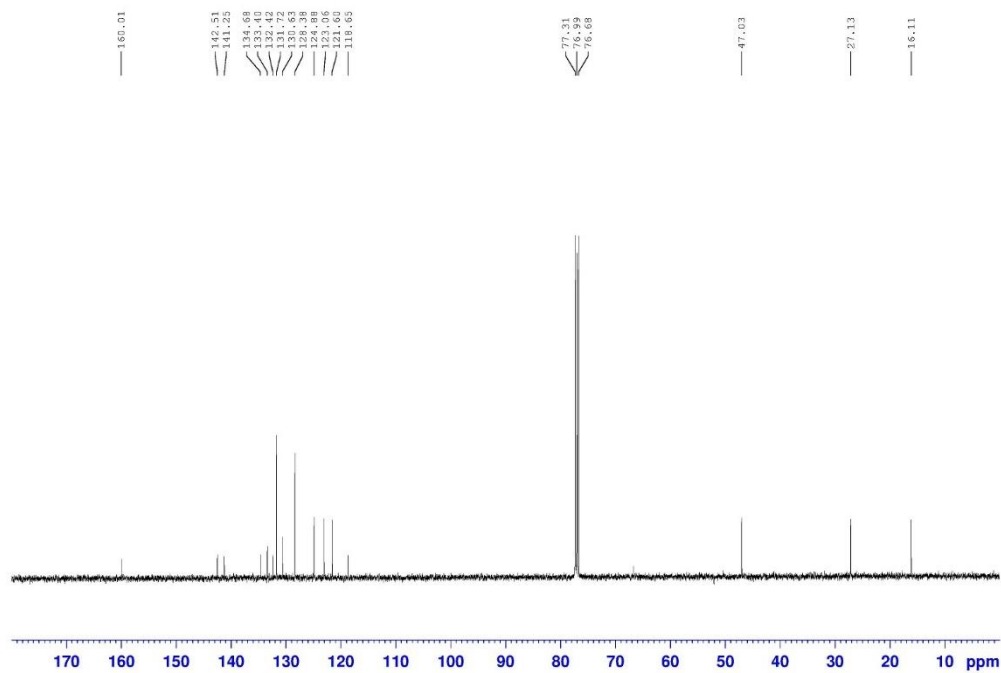

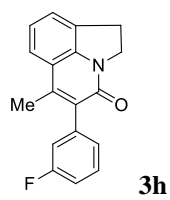

2056-10a BBFO 1

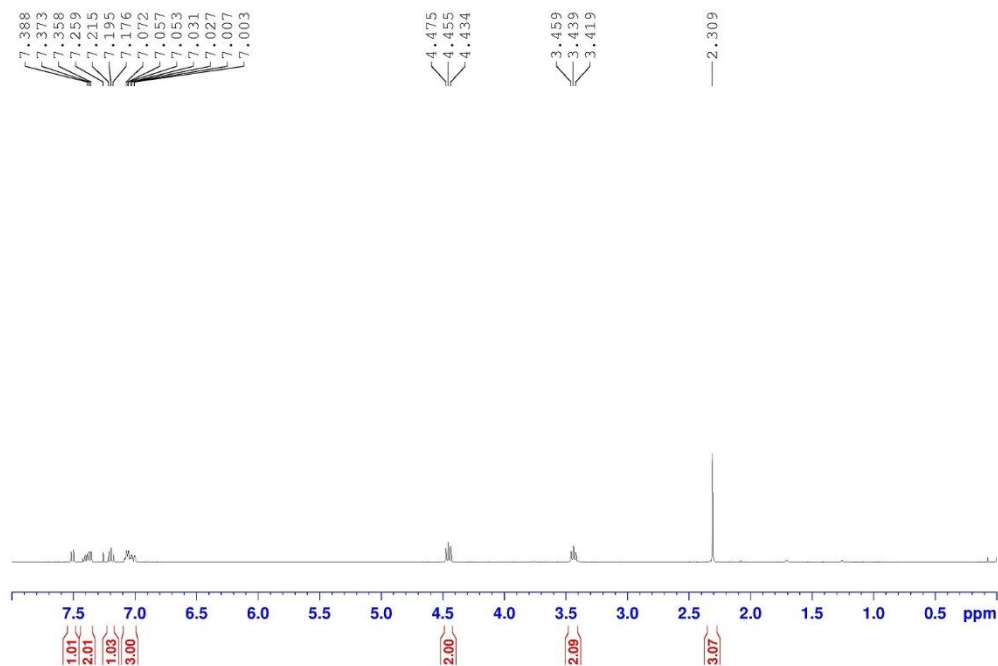

2056-10a BBFO 1

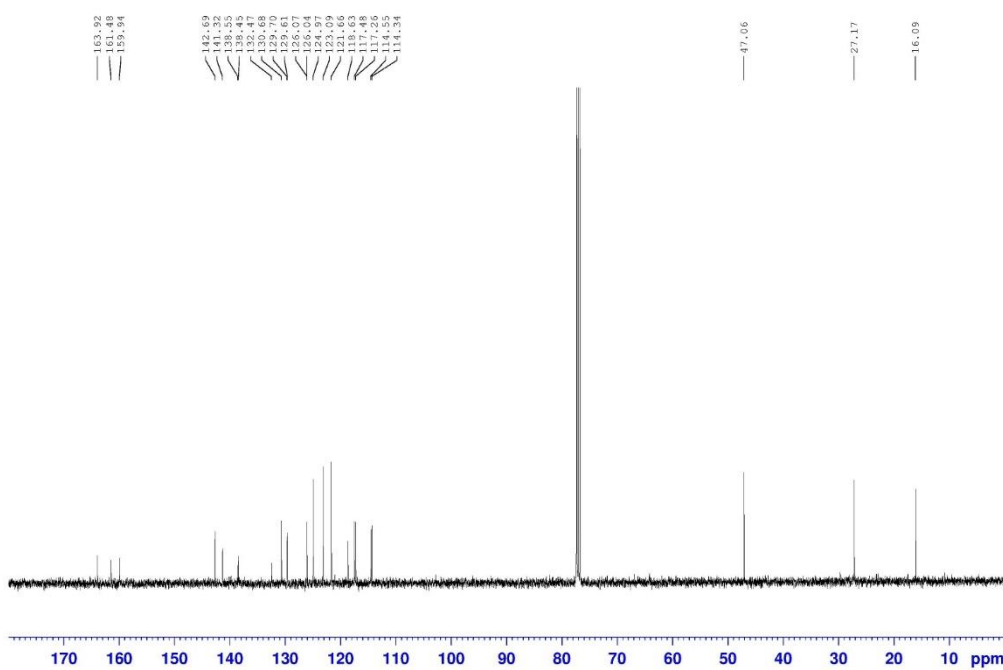

2056-10 BBFO 1

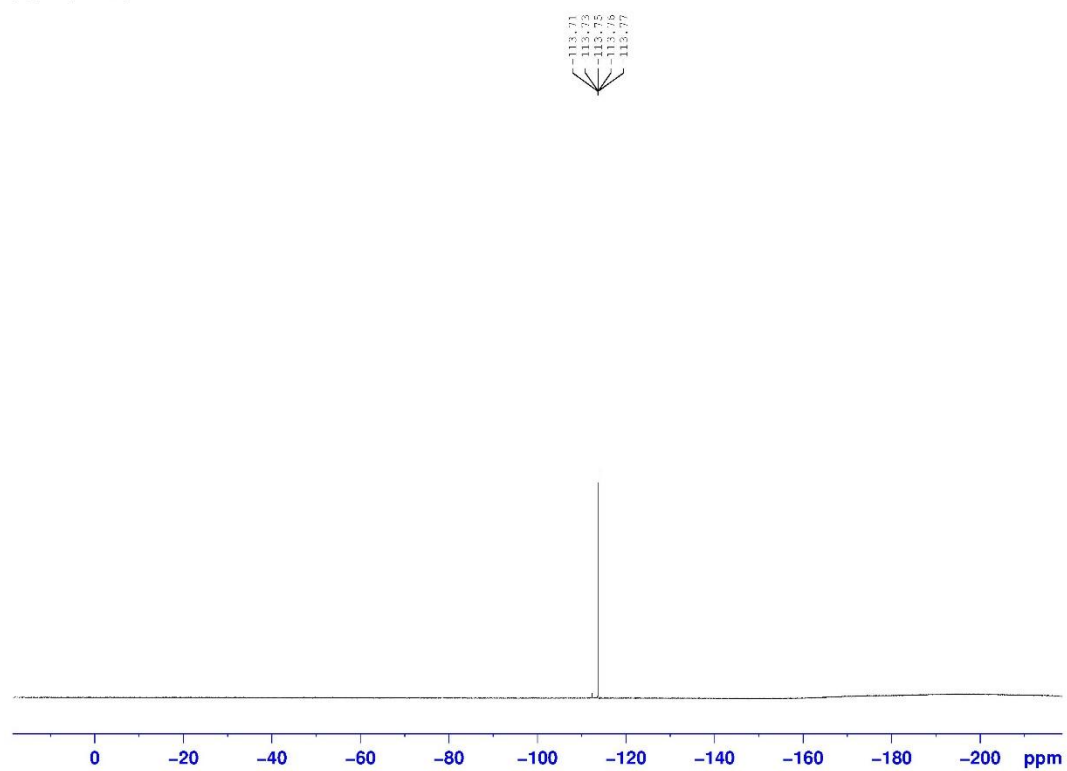

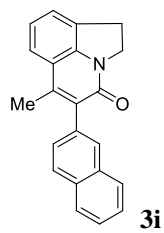

2064-20, 1H, CDCl<sub>3</sub>, AV 400M, 20140605

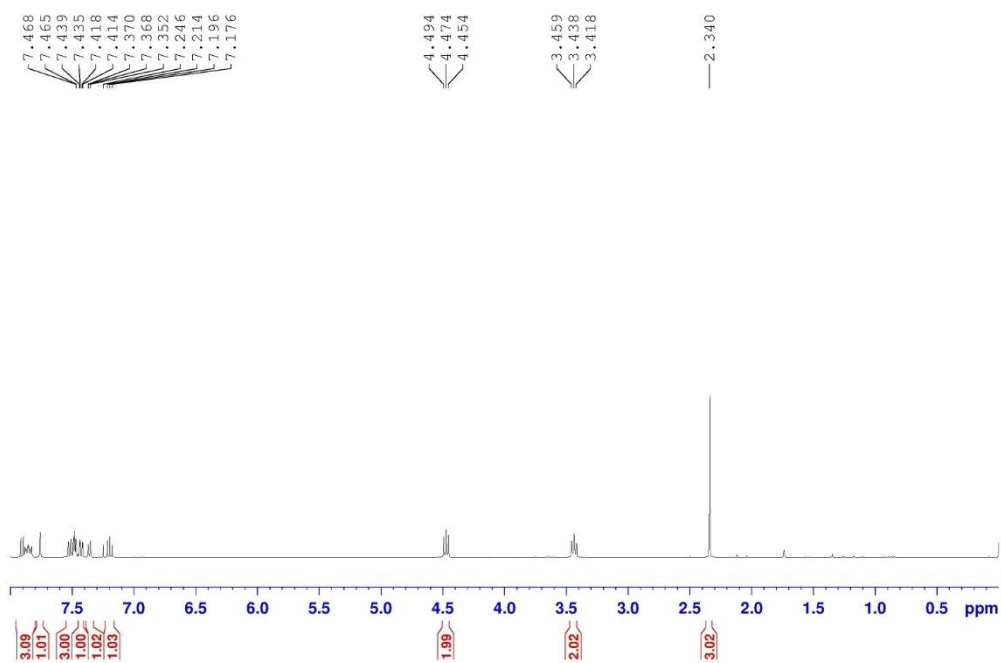

2064-20, 1H, CDCl<sub>3</sub>, AV 400M, 20140605

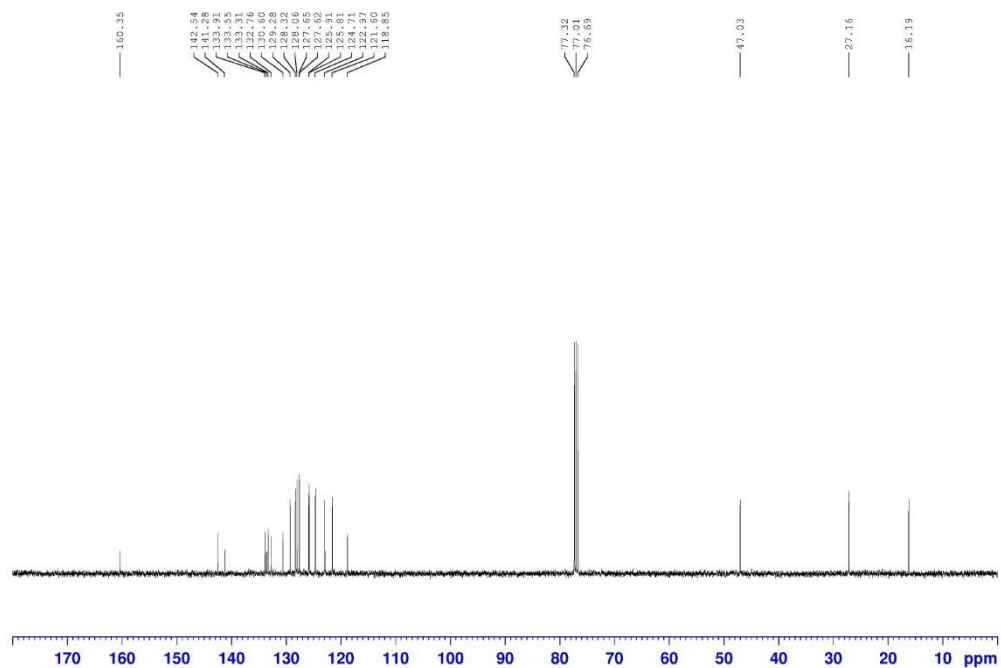

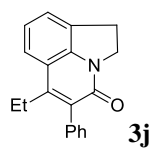

2030-20-1, BBFO 1

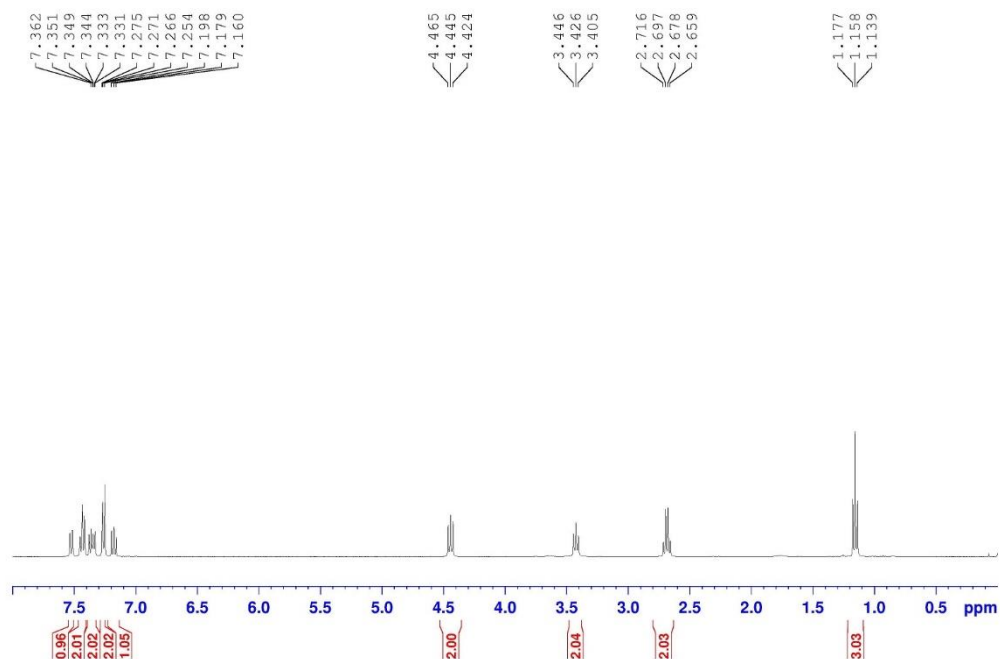

2030-20-1, <sup>1</sup>H, CDCl<sub>3</sub>, AV 400M, 20140605

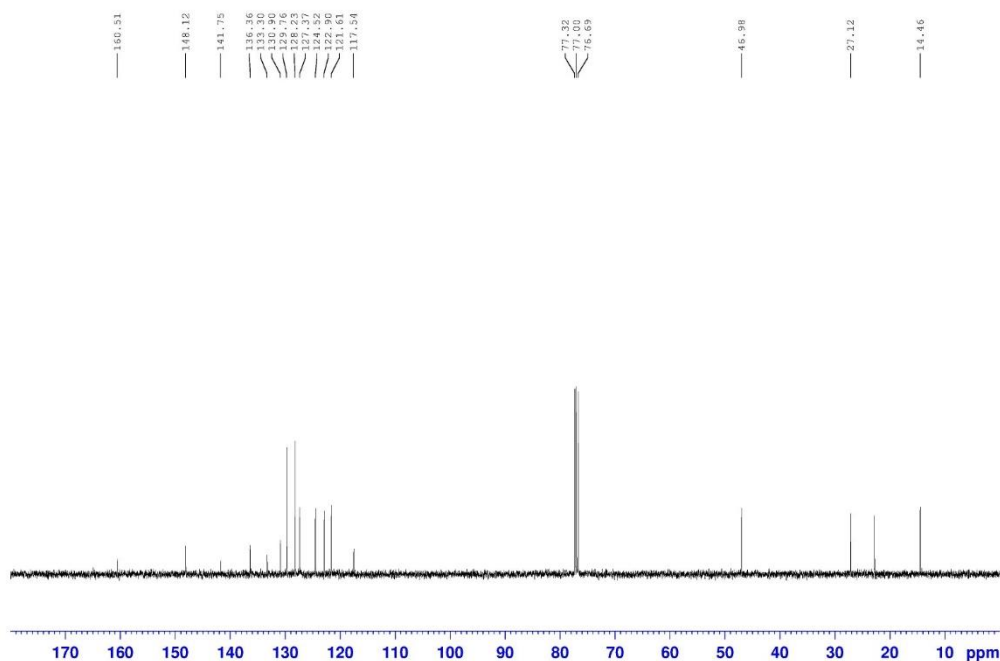

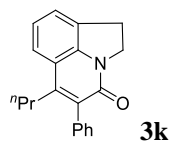

2030-20-2, 1H, CDCl<sub>3</sub>, AV 400M, 20140605

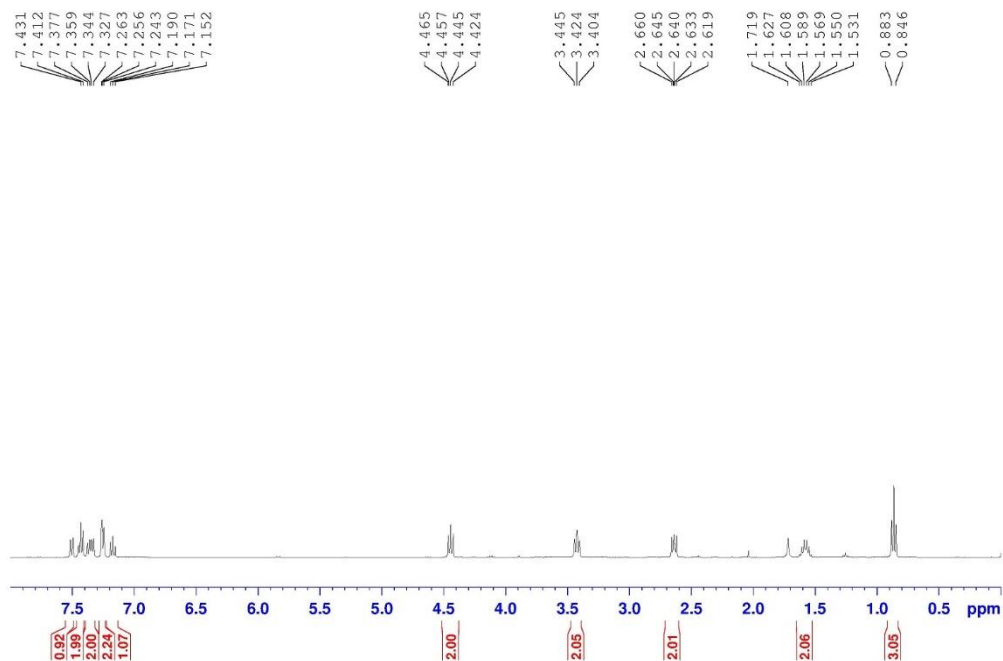

2030-20-2, 1H, CDCl<sub>3</sub>, AV 400M, 20140605

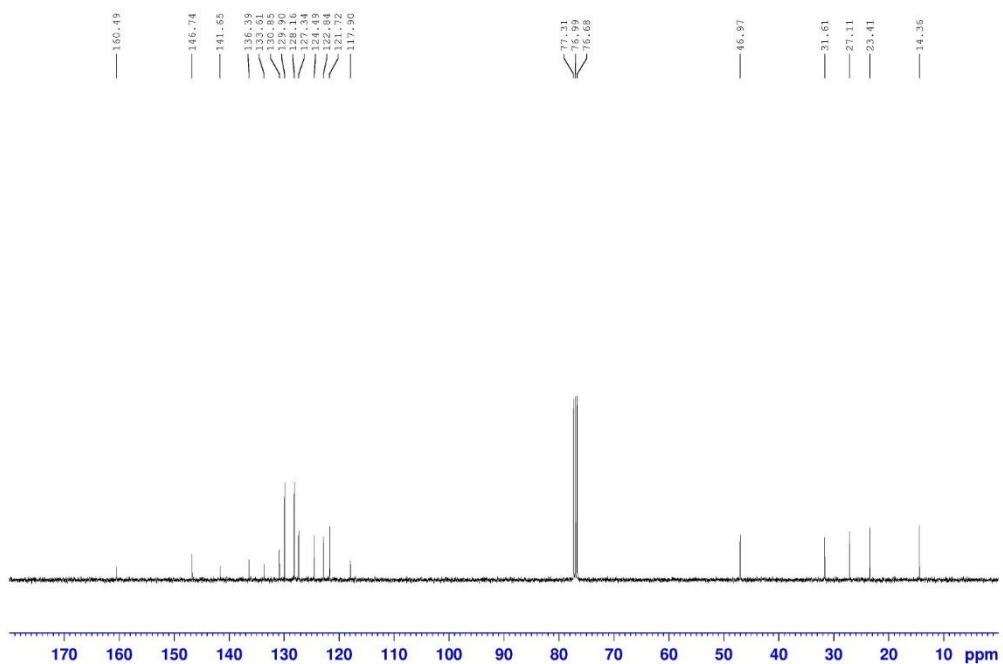



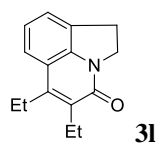

2036-20 BBFO 1

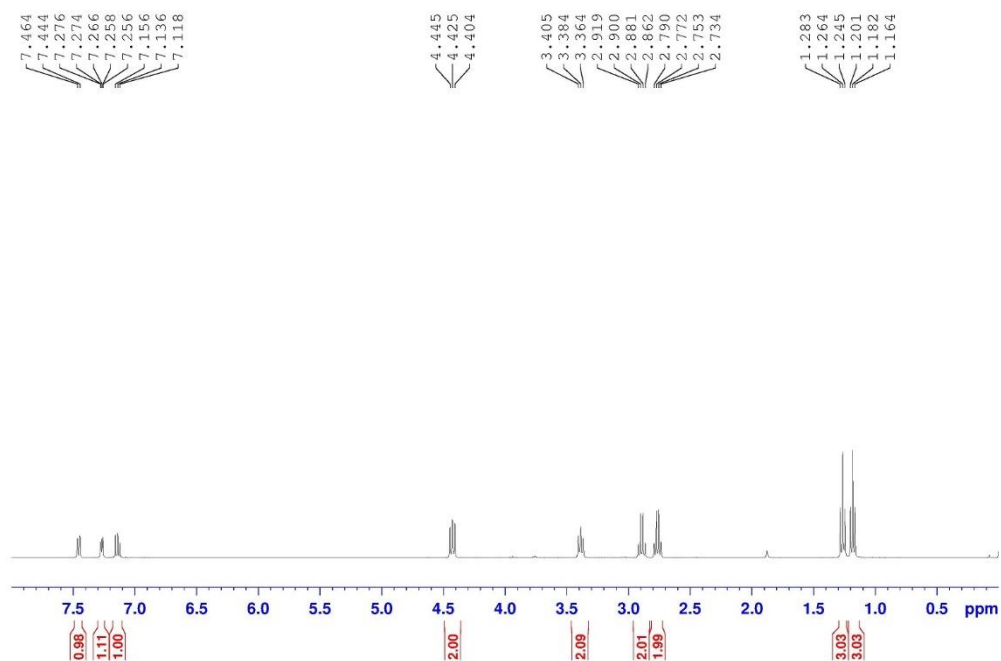

2036-20 BBFO 1

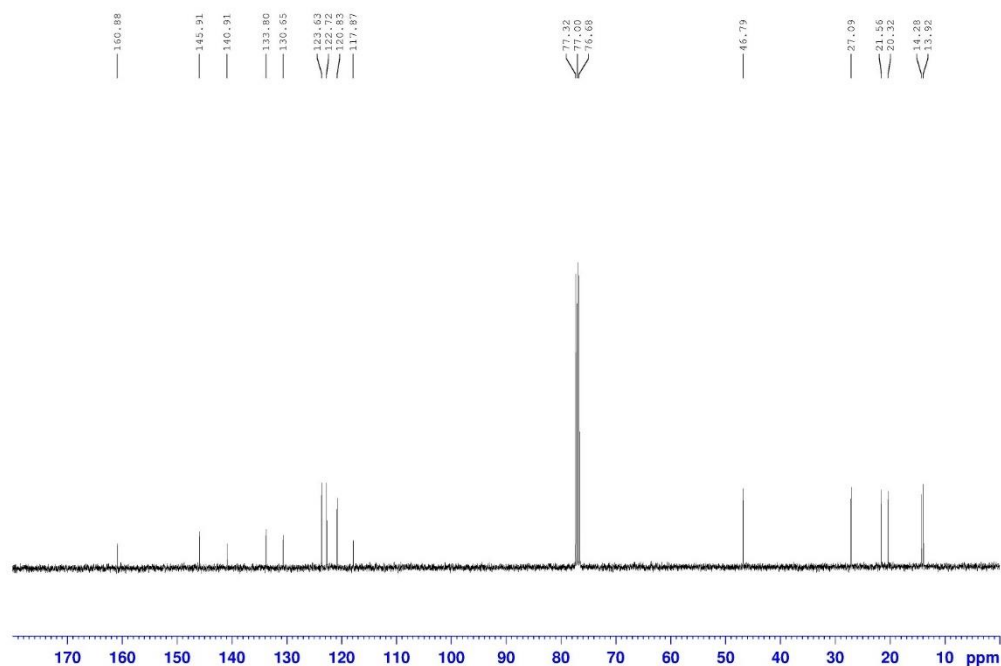

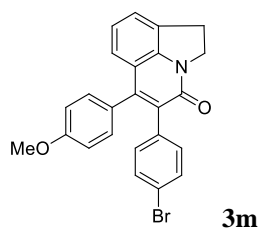

BBF01, 400, 3036-1

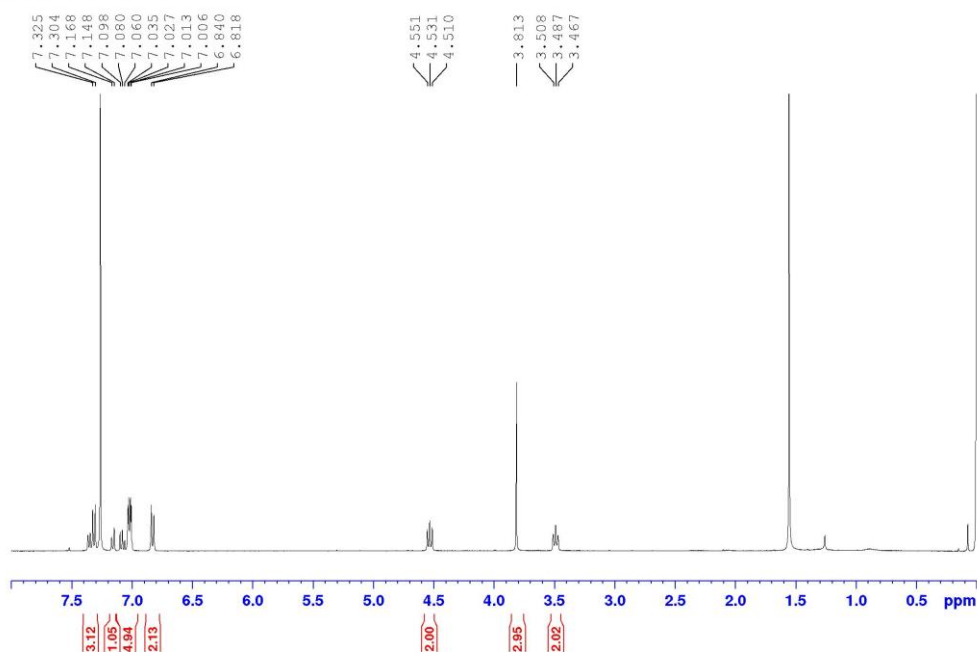

3036-1p, AV400, Dec14

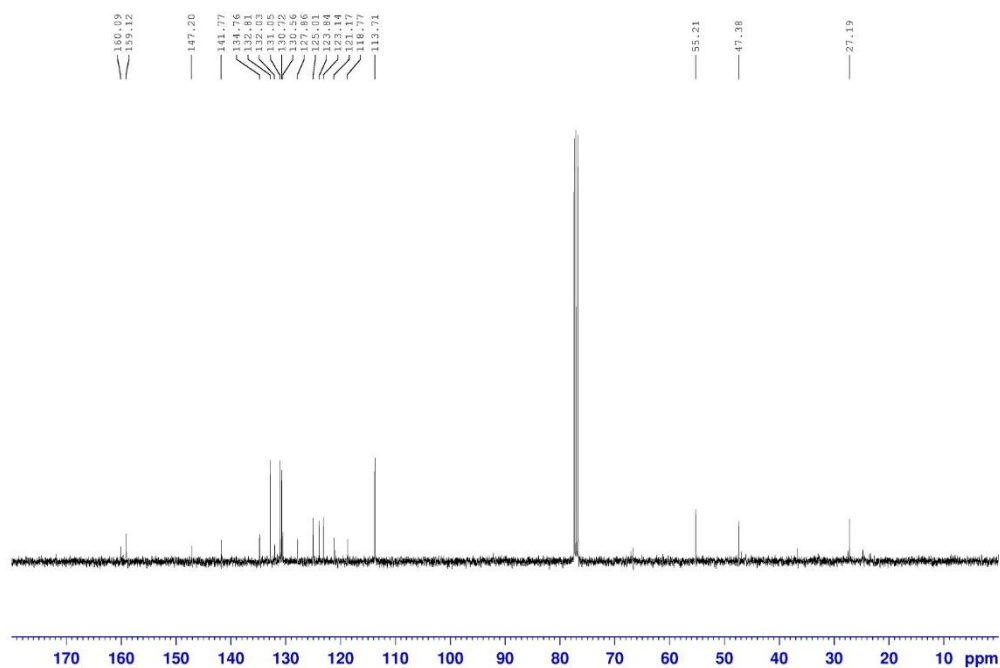

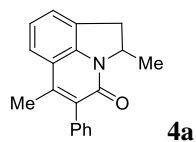

2064-10, 1H, CDCl<sub>3</sub>, AV 400M, 20140605

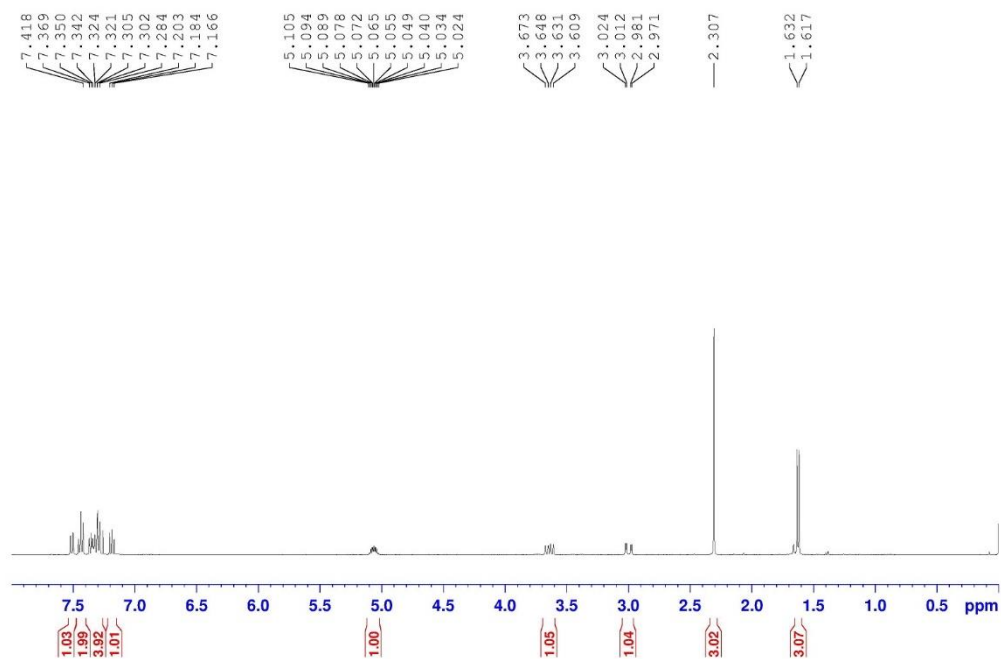

2064-10, 1H, CDCl<sub>3</sub>, AV 400M, 20140605

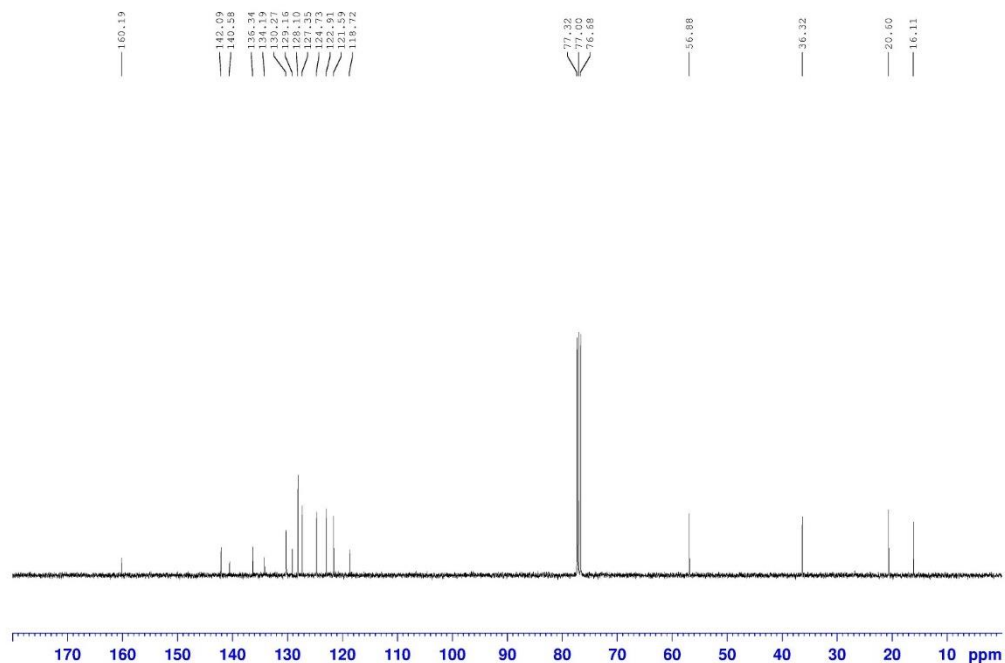

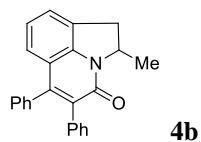

2184-10, AV400, sep 14

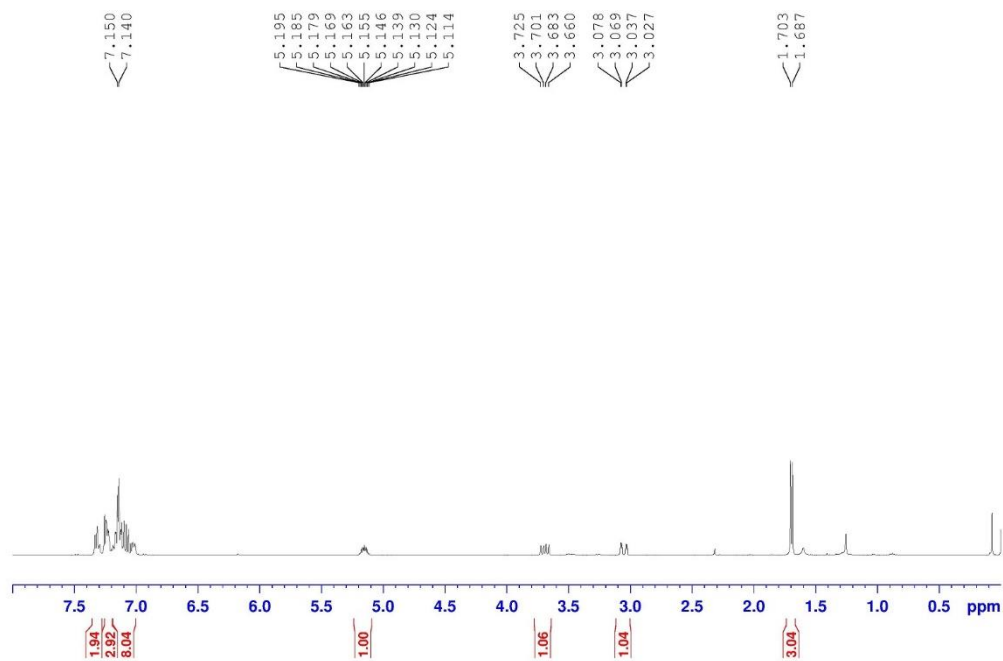

2184-10, AV400, sep 14

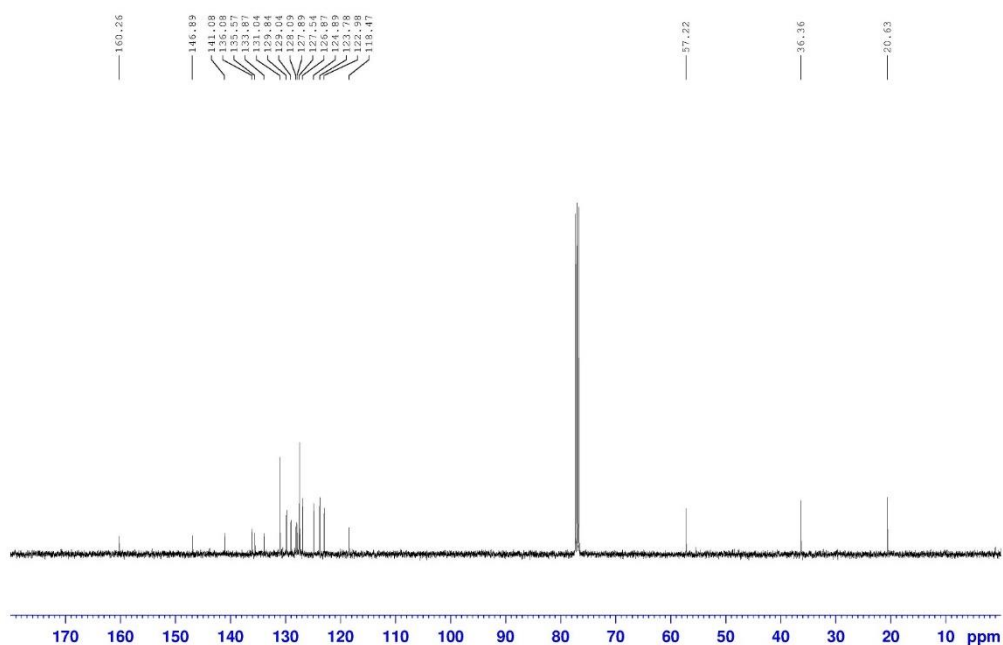

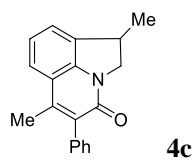

2076-10A, <sup>1</sup>H NMR, CDCl<sub>3</sub>, BBFO-01, Jul 14

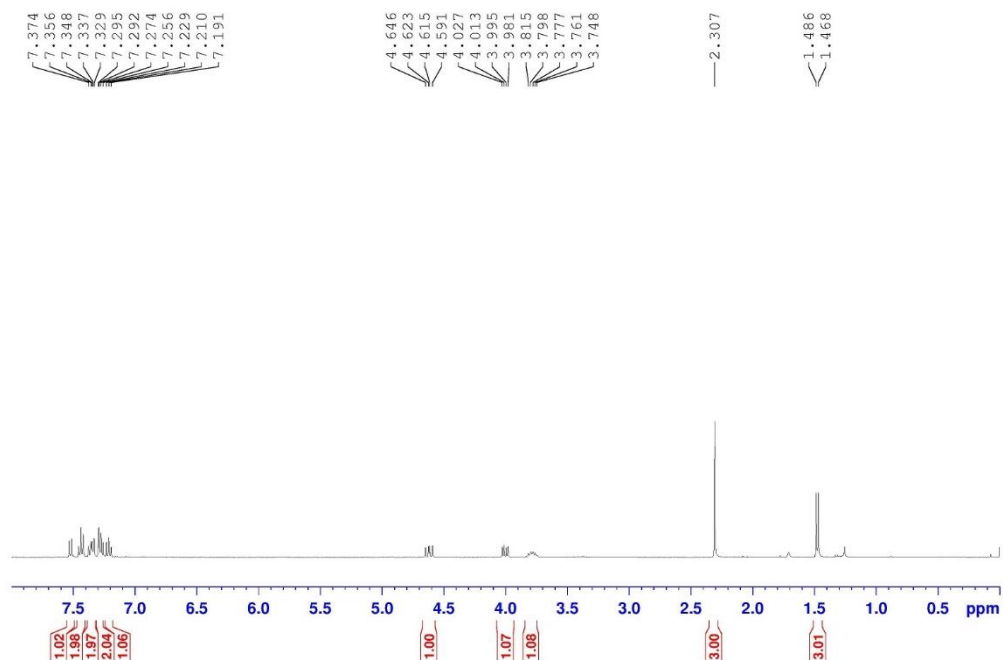

2076-10A, <sup>1</sup>H NMR, CDCl<sub>3</sub>, BBFO-01, Jul 14

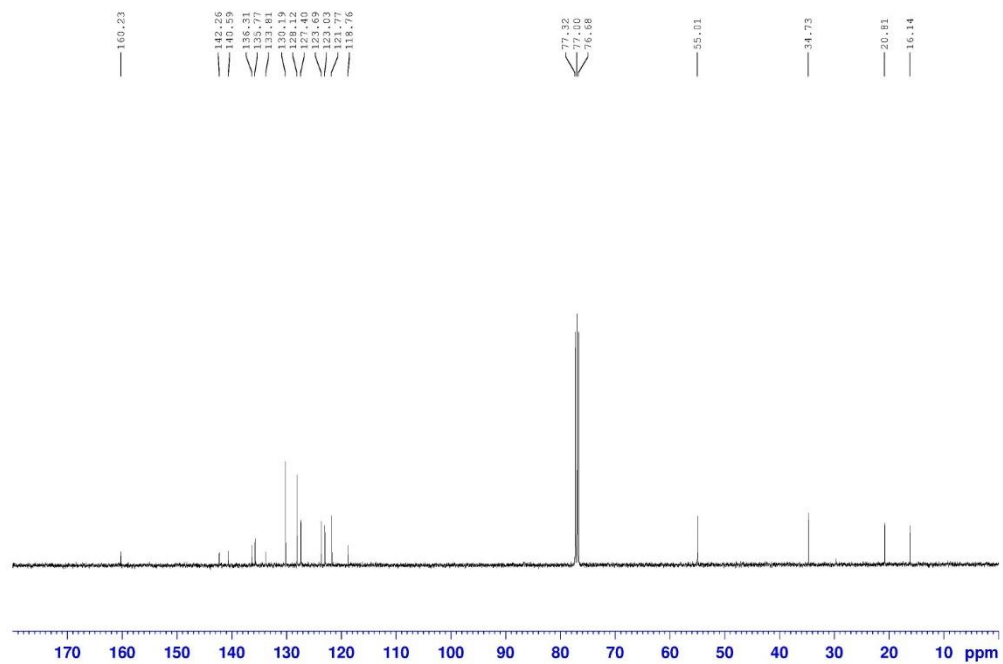

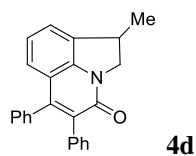

2184-10, AV400, sep 14

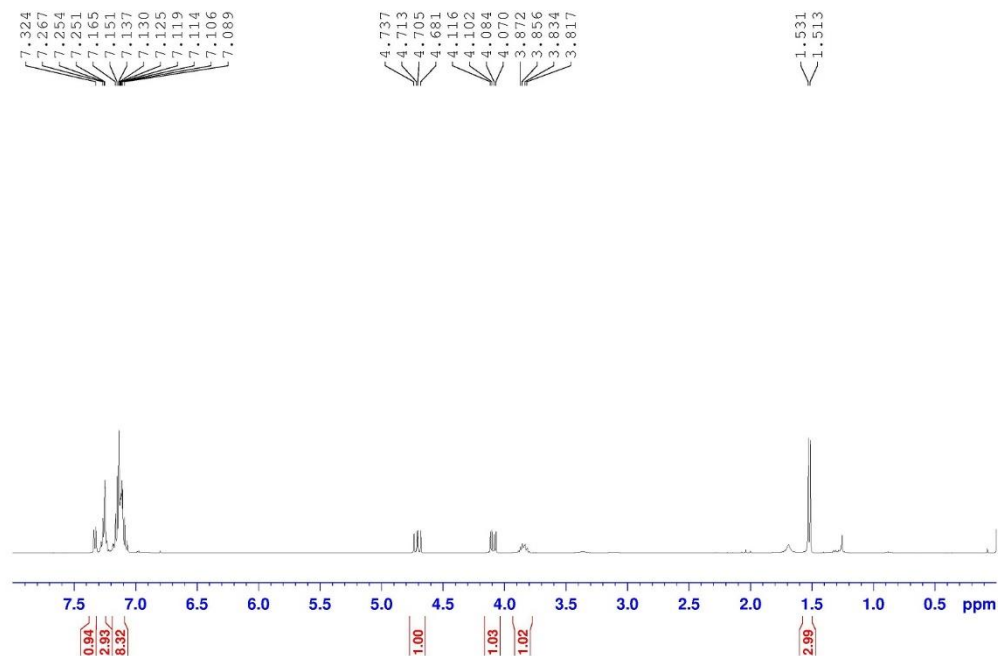

2184-10, AV400, sep 14

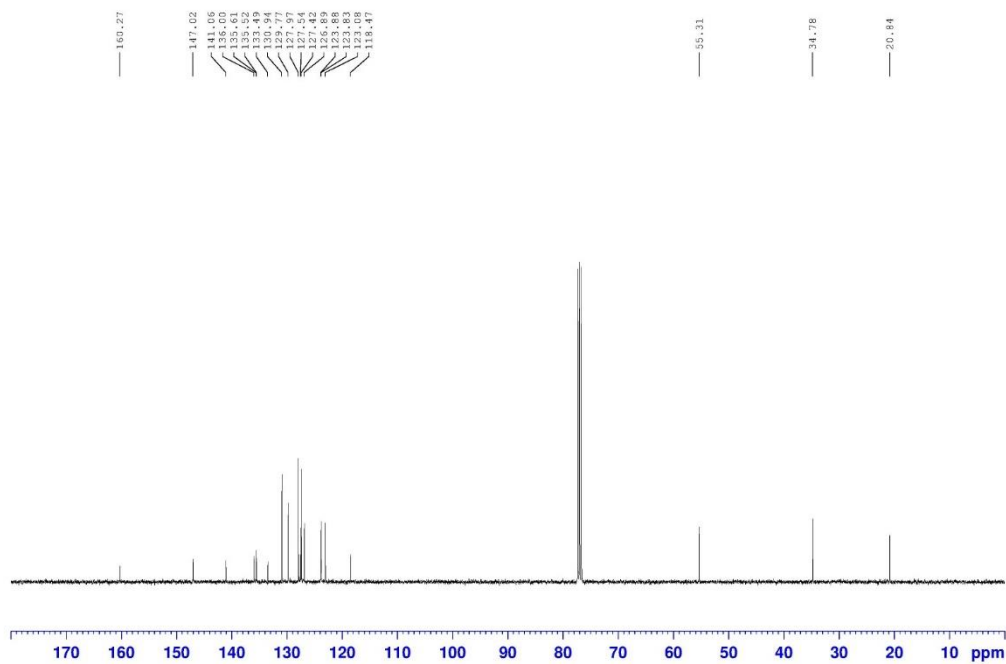

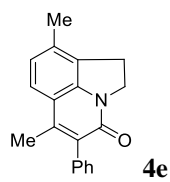

2094-20, <sup>1</sup>H NMR, CDCl<sub>3</sub>, BBFO-01, Jul 14

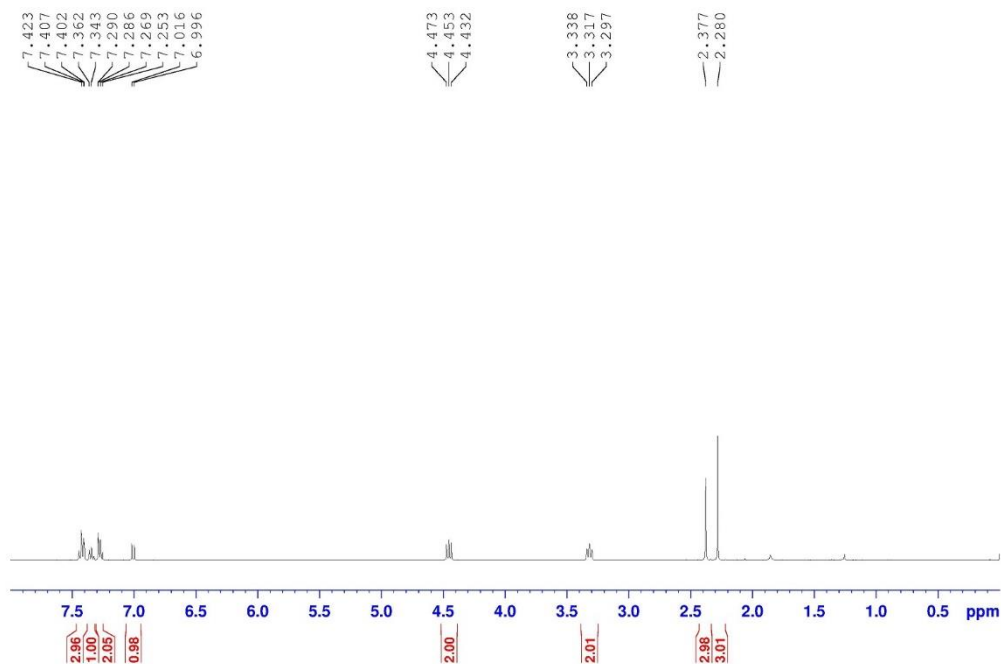

2094-20, <sup>1</sup>H NMR, CDCl<sub>3</sub>, BBFO-01, Jul 14

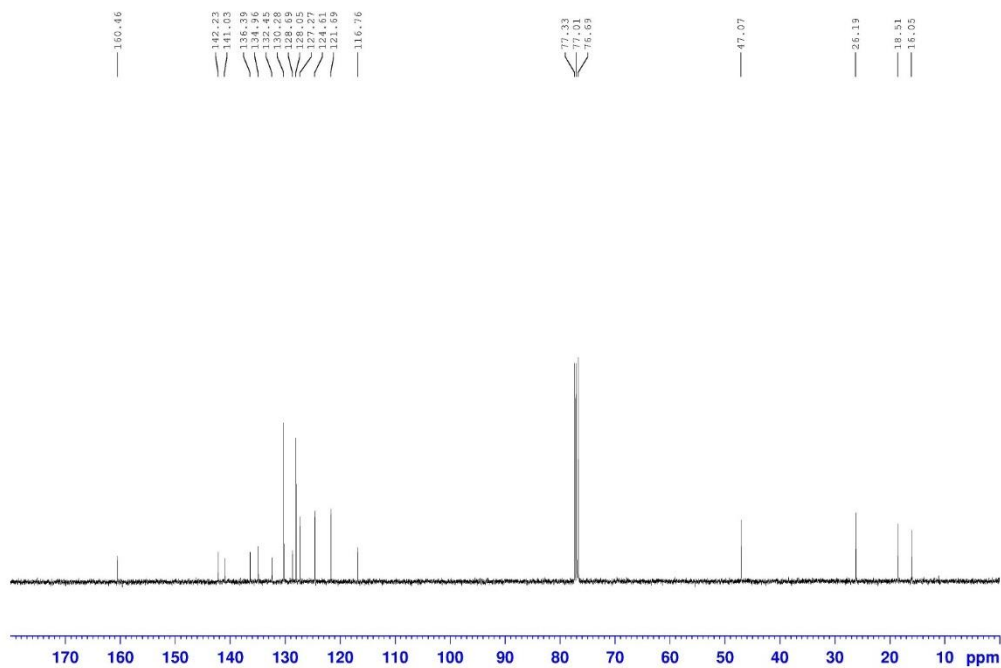

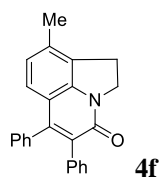

2194-2, AV400, sep 14

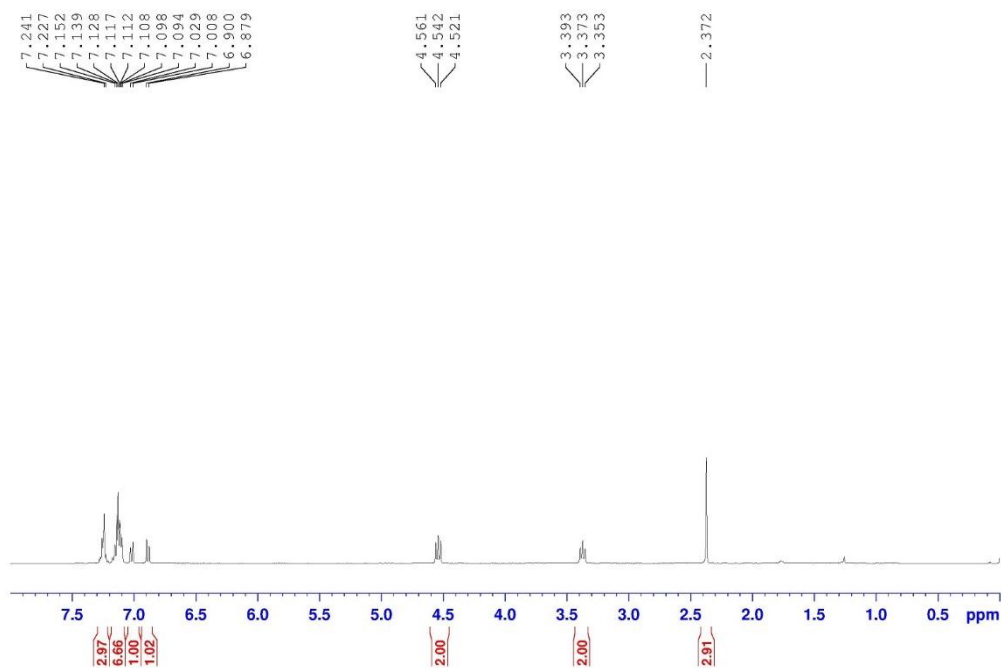

2194-2, AV400, sep 14

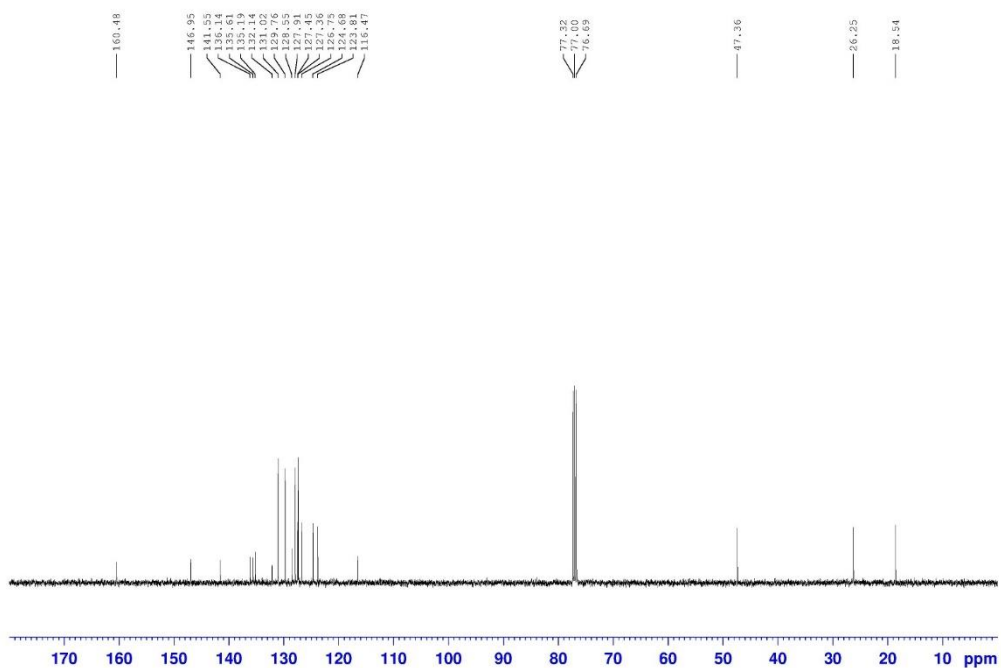



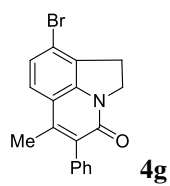

3034-2, AV400, Dec14

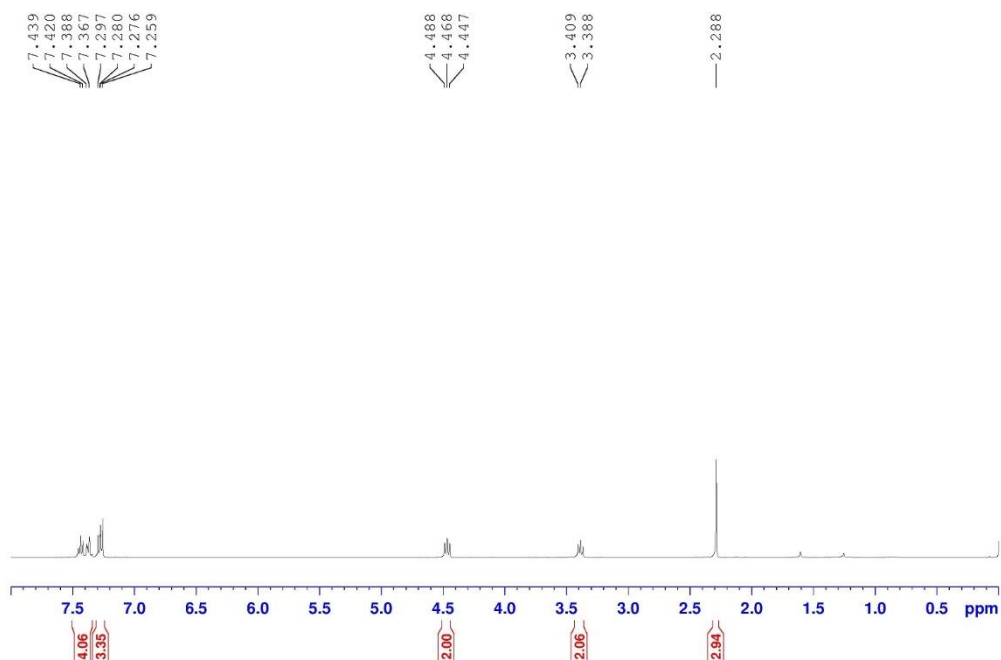

3034-2, AV400, Dec14

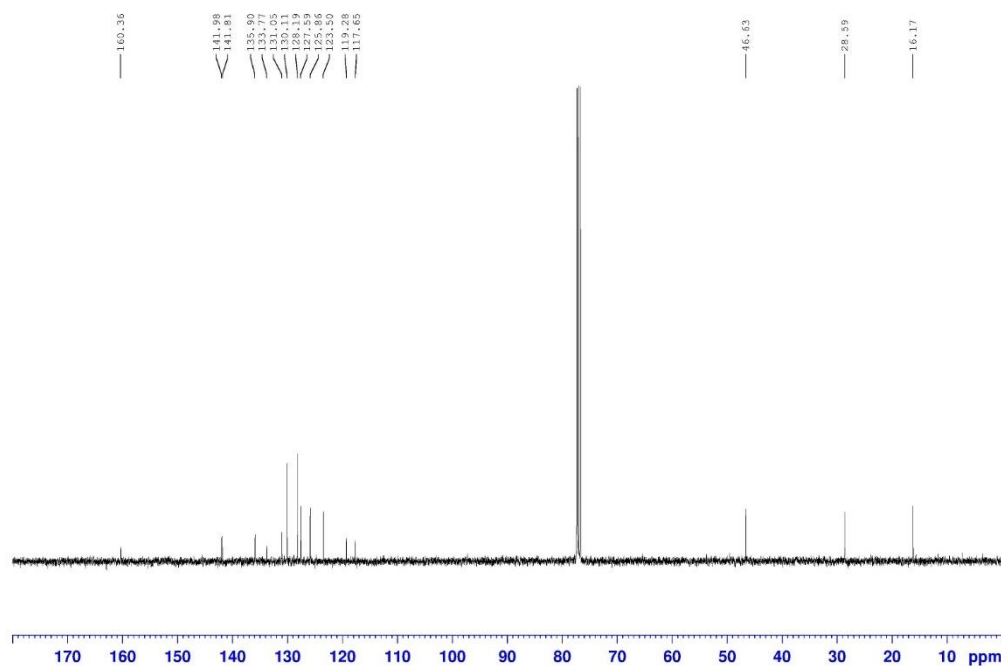

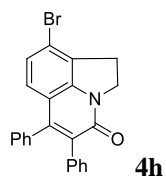

3036-1, AV400, Dec14

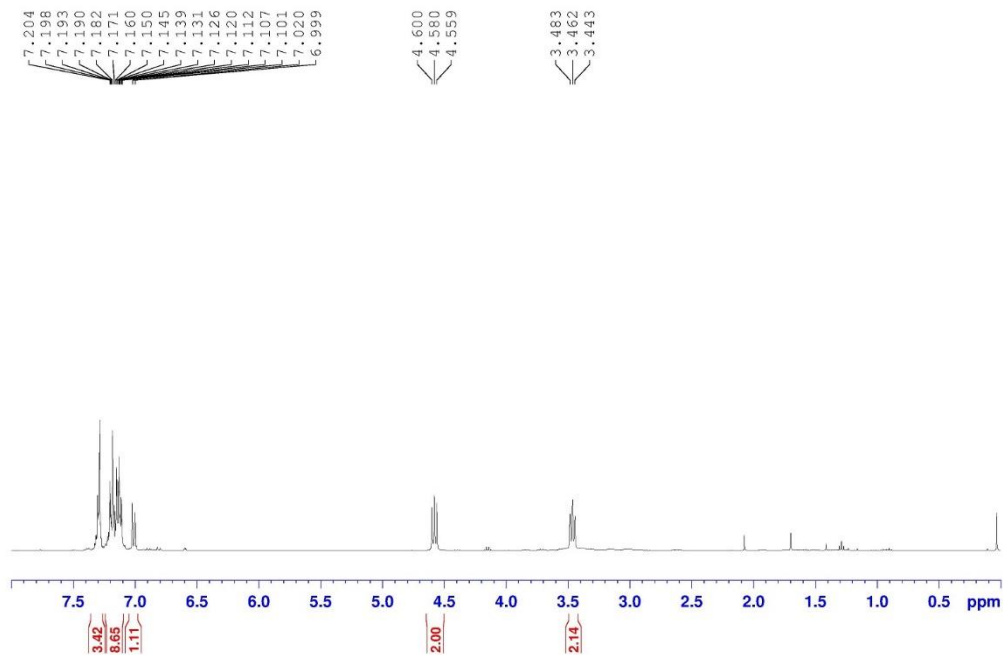

3036-1, 1H NMR, CDC13, BBFO1, 20141203

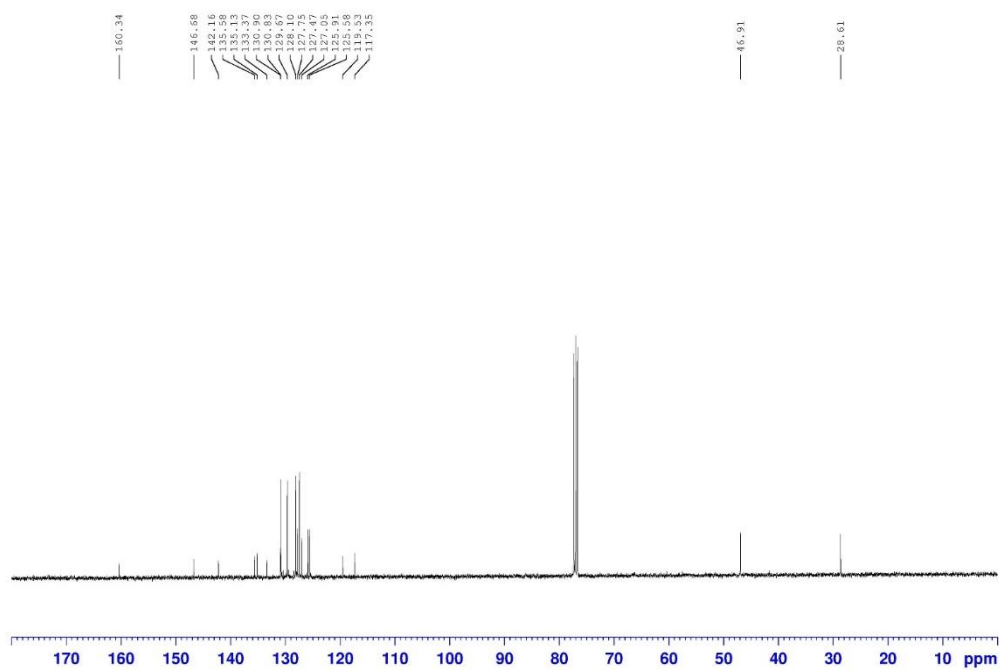

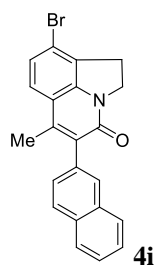

3034-3, AV400, Dec14

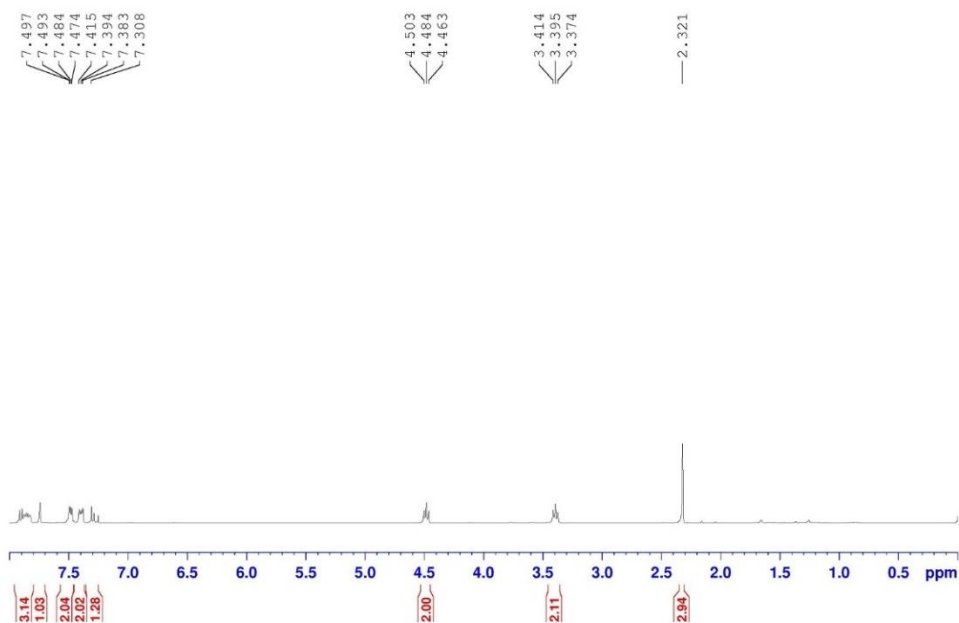

3034-3, AV400, Dec14

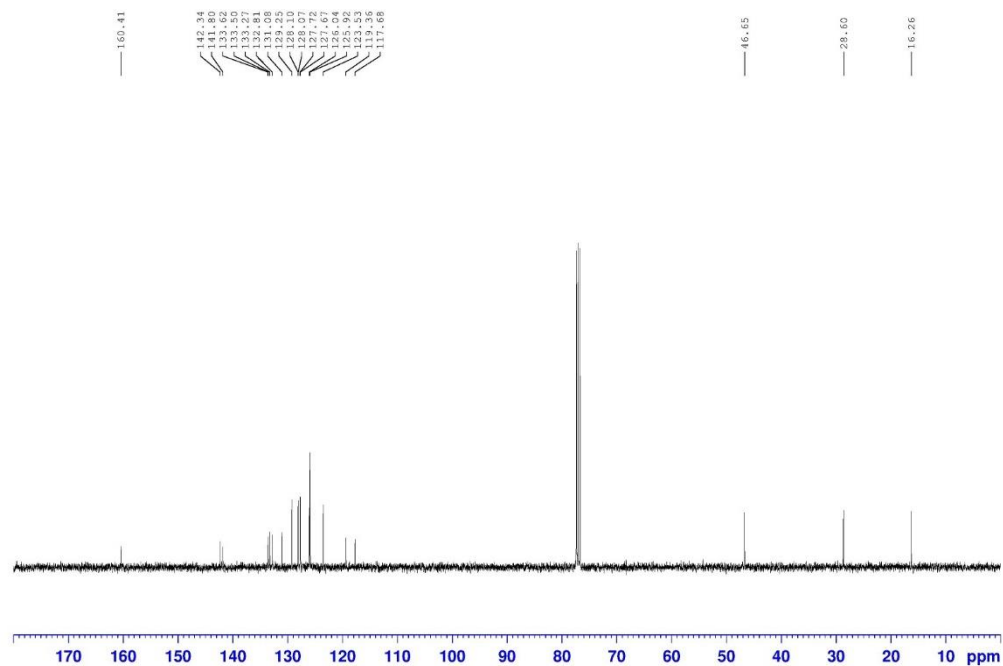

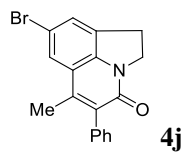

2072-10a, <sup>1</sup>H NMR, CDCl<sub>3</sub>, BBFO-01, Jul 14

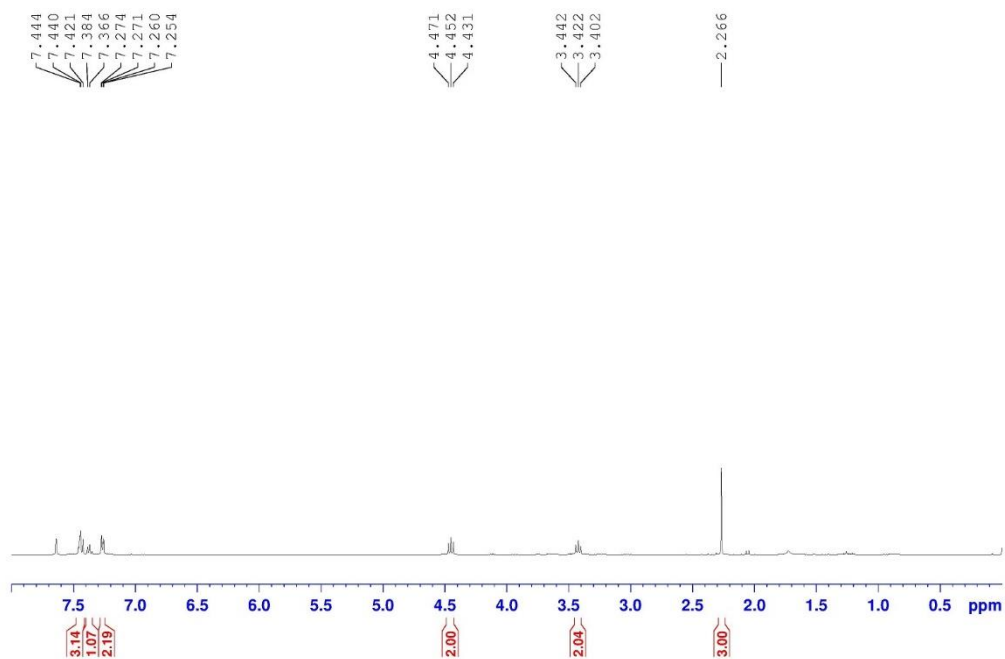

2072-10a, <sup>1</sup>H NMR, CDCl<sub>3</sub>, BBFO-01, Jul 14

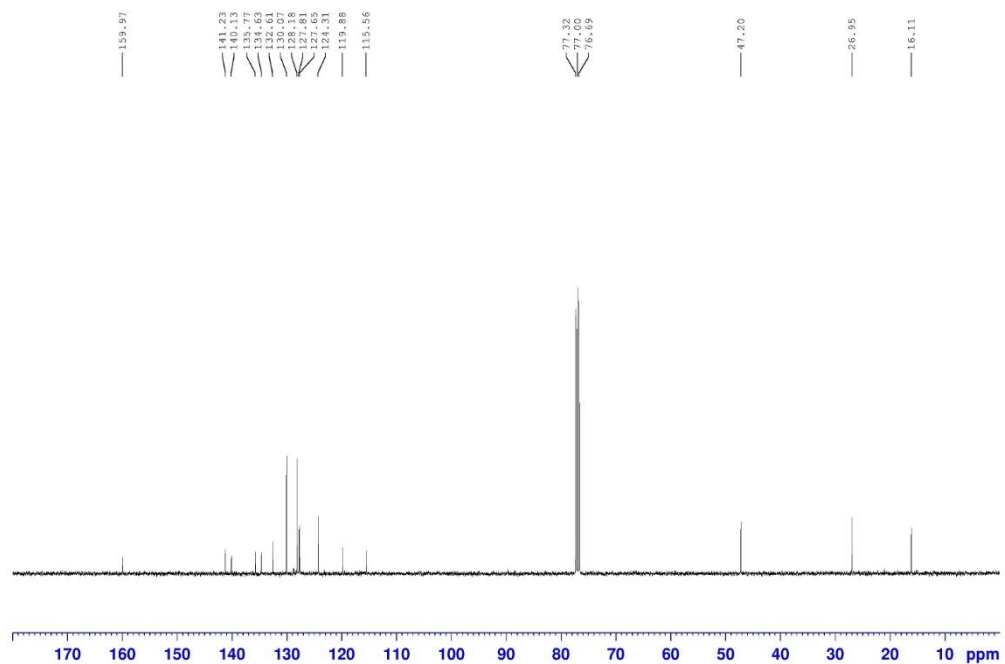

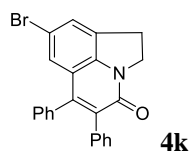

2088-10, <sup>1</sup>H NMR, CDCl<sub>3</sub>, AV400, 20140701

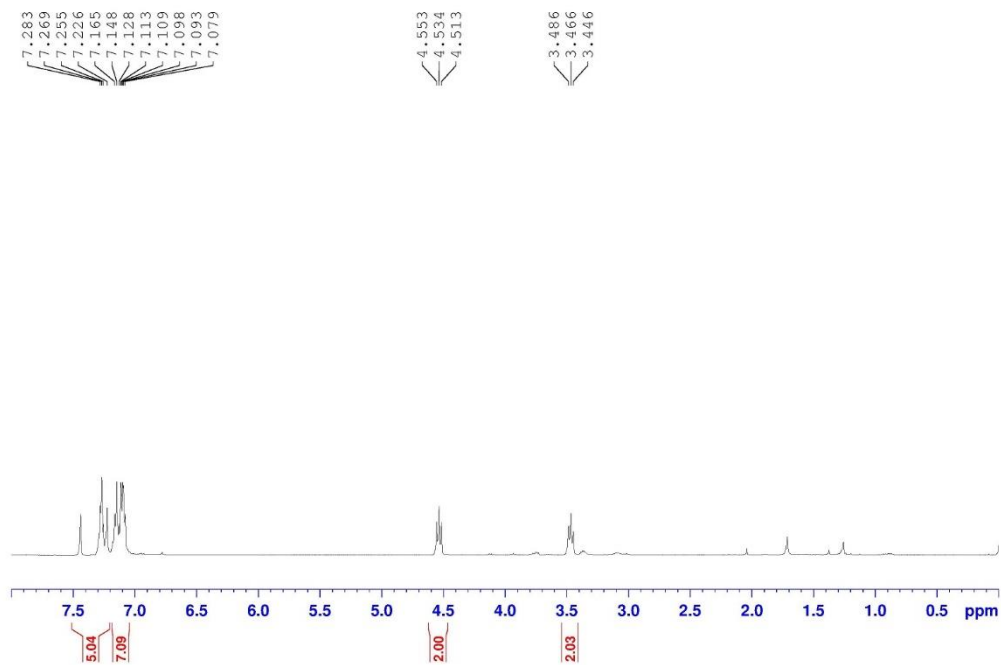

2088-10, <sup>1</sup>H NMR, CDCl<sub>3</sub>, AV400, 20140701

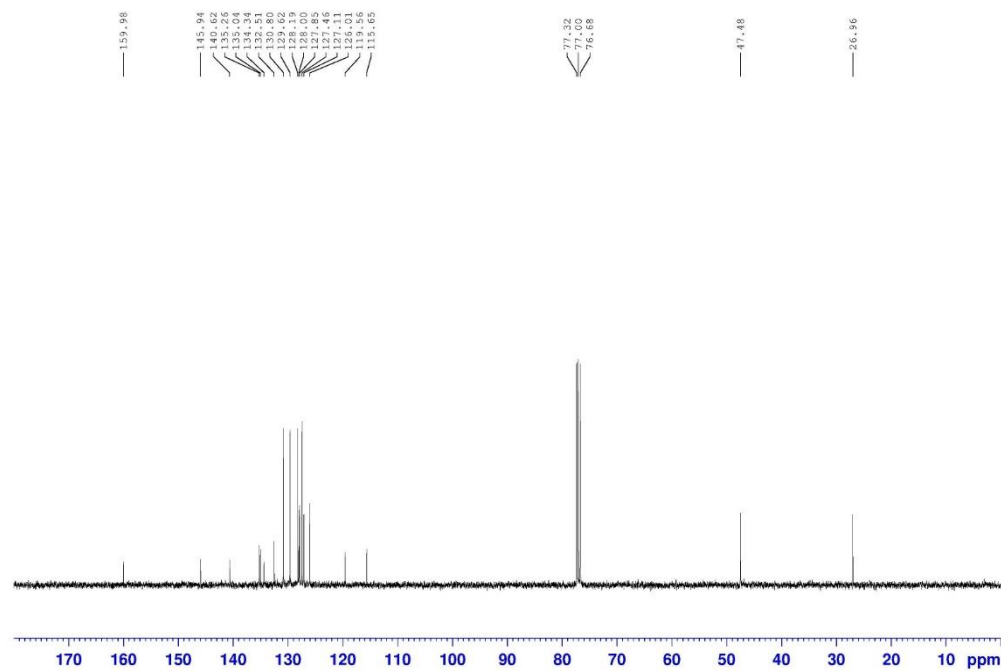

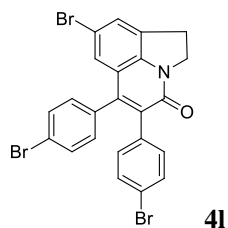

2090-10, <sup>1</sup>H NMR, CDCl<sub>3</sub>, AV400, 20140701

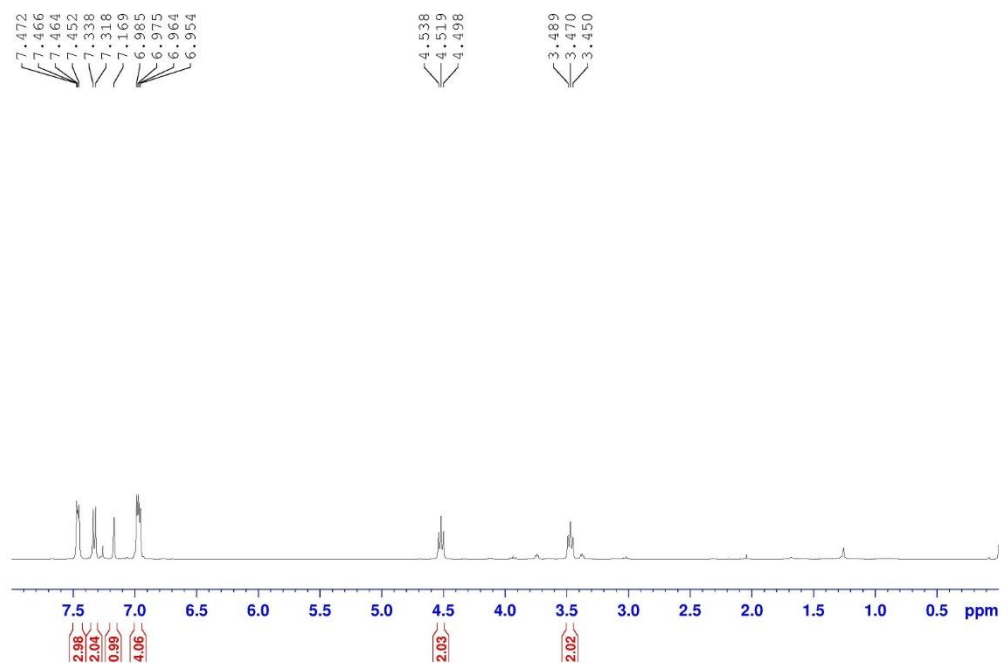

2090-10, <sup>1</sup>H NMR, CDCl<sub>3</sub>, AV400, 20140701

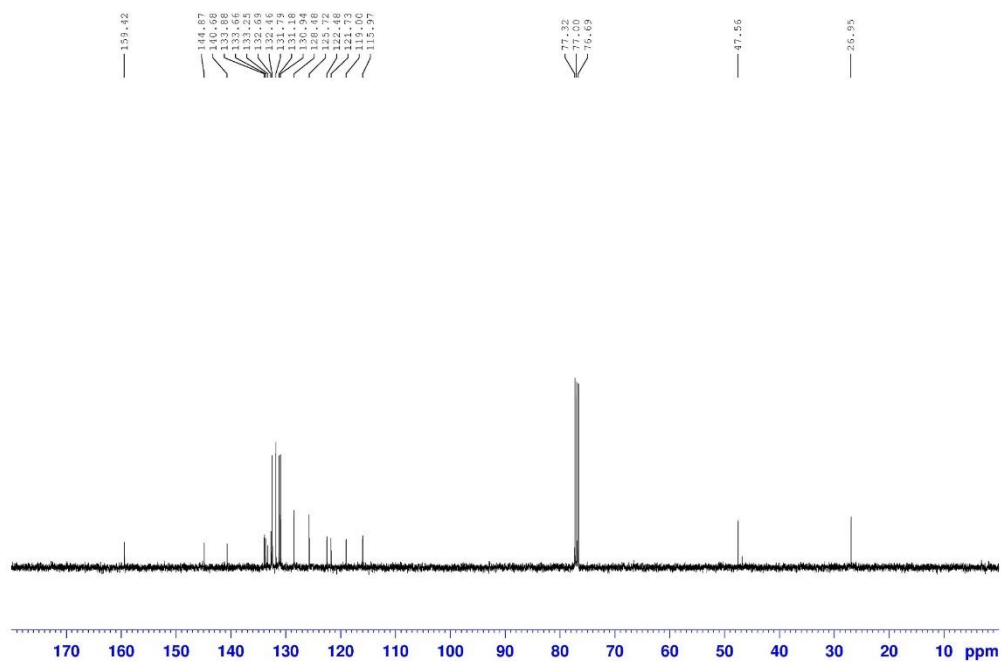

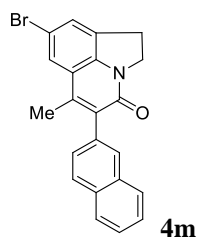

2072-20, <sup>1</sup>H NMR, CDCl<sub>3</sub>, BBFO-01, Jul 14

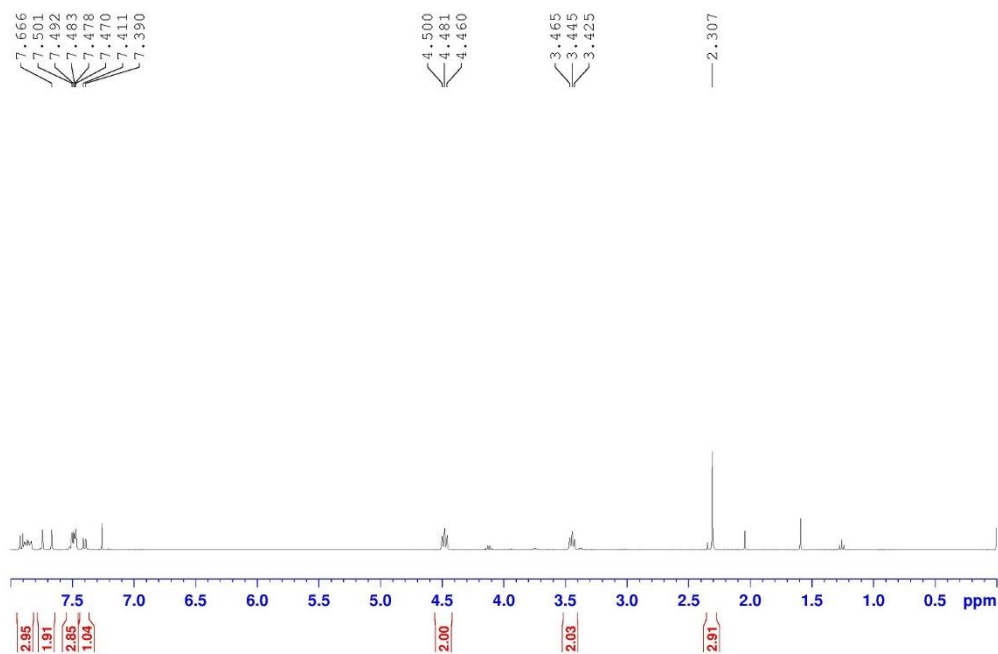

2072-20, <sup>1</sup>H NMR, CDCl<sub>3</sub>, BBFO-01, Jul 14

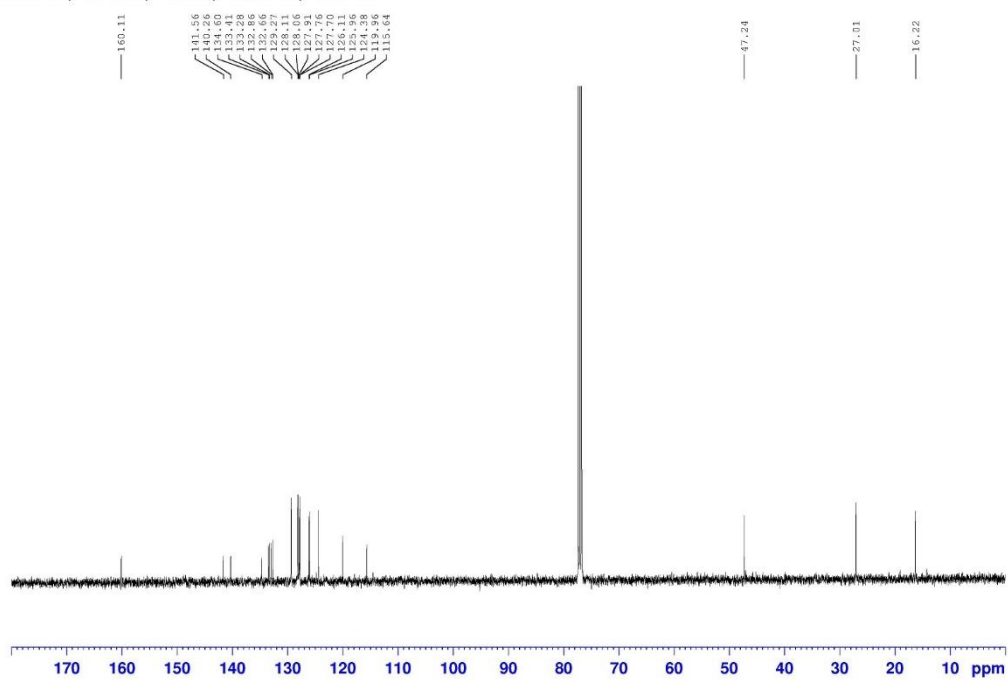

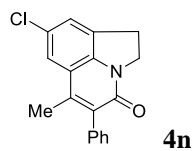

2086-20, <sup>1</sup>H NMR, CDCl<sub>3</sub>, BBFO-01, Jul 14

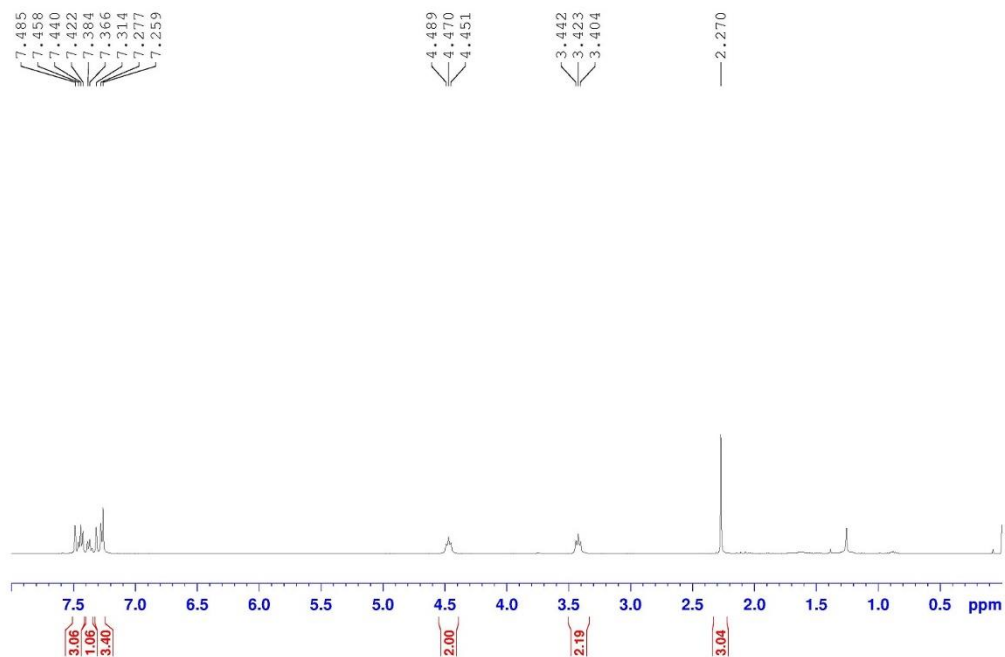

2086-20, AV400, Dec14

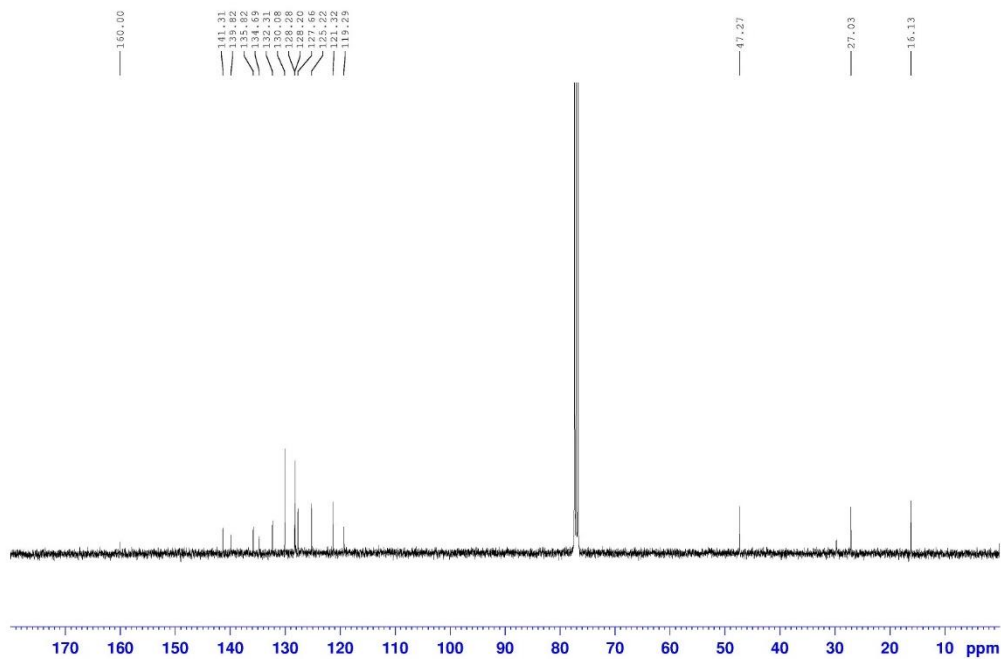



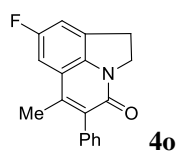

2194-4, AV400, sep 14

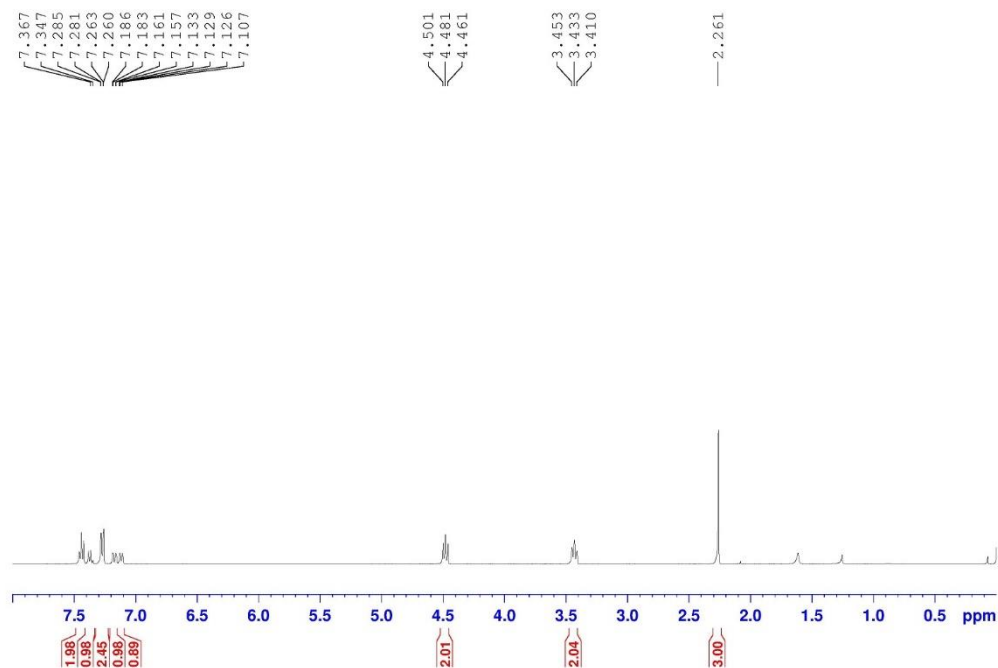

2194-4, AV400, sep 14

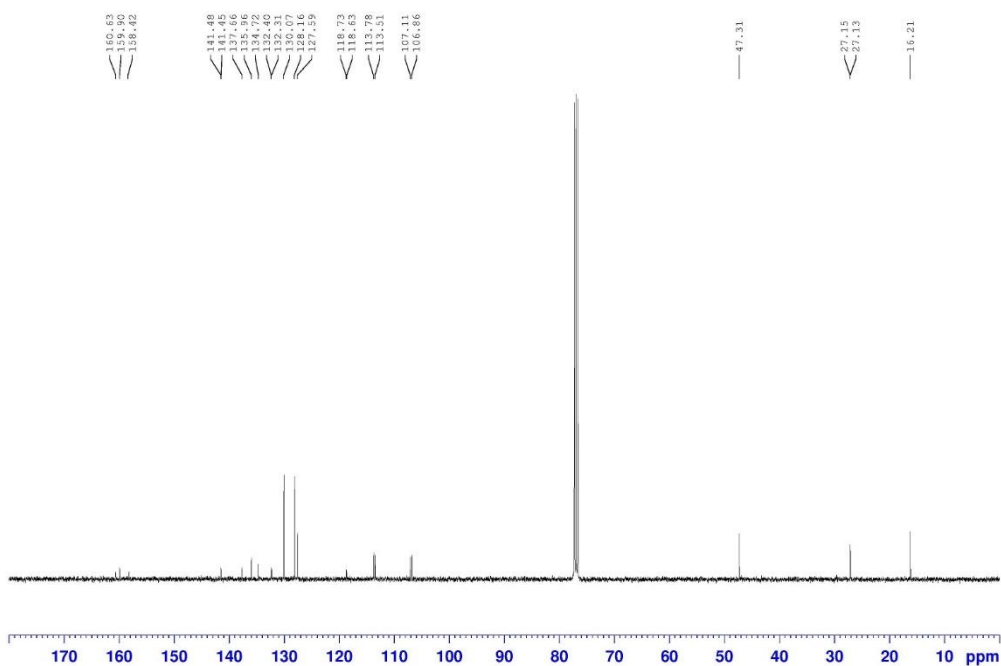

2194-4, BBF01

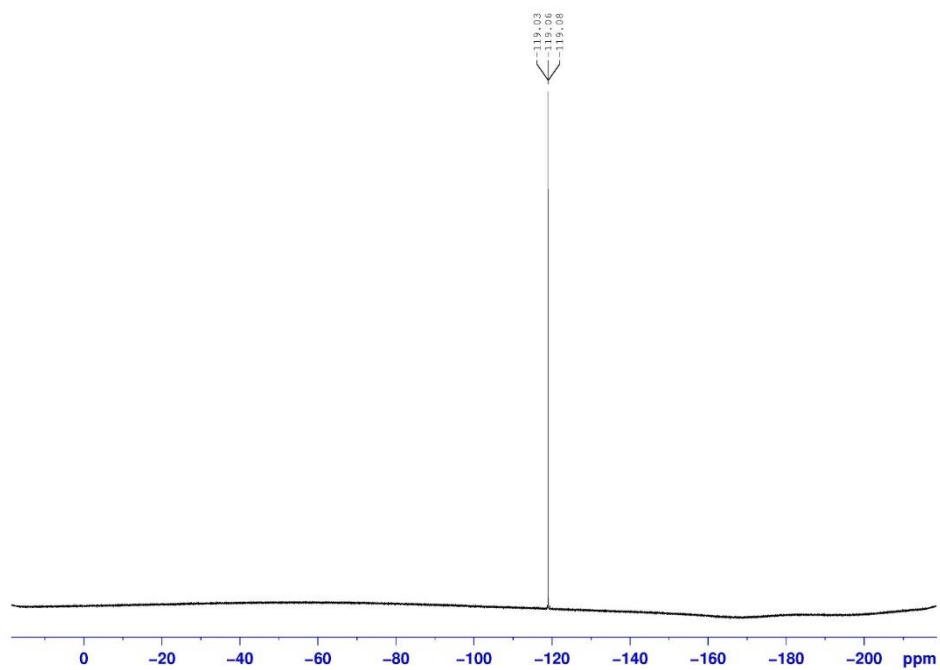

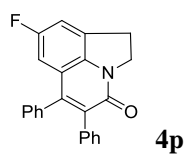

2194-3, AV400, sep 14

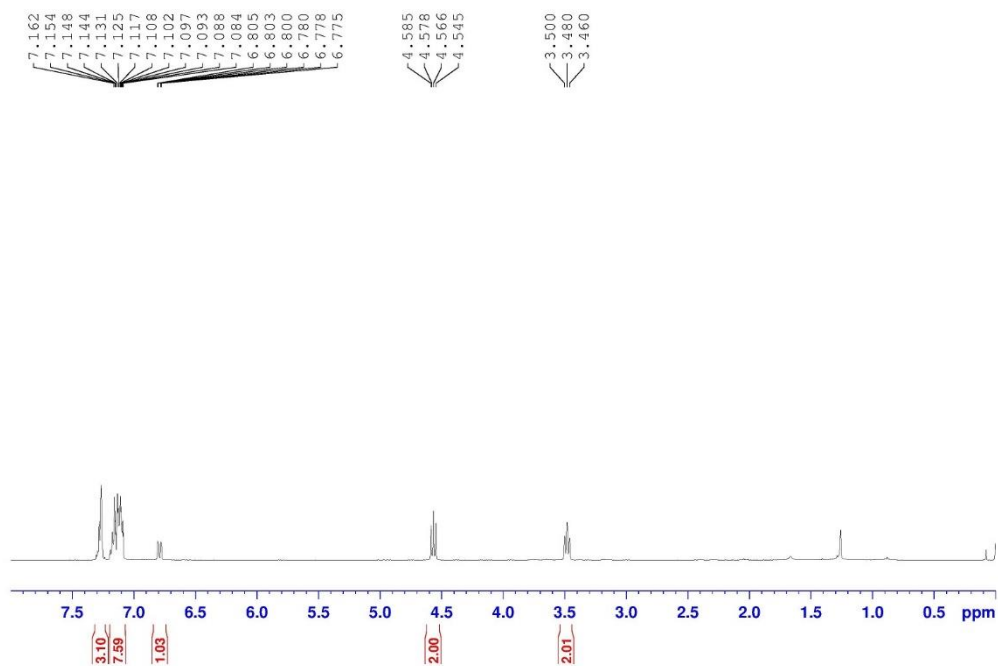

2194-3, AV400, sep 14

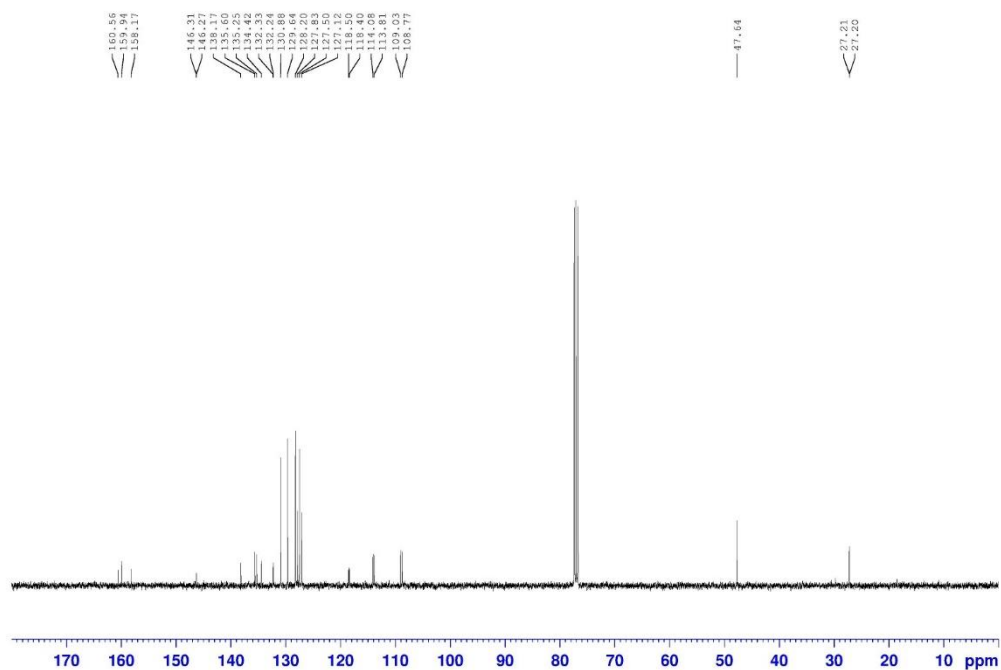

2194-3

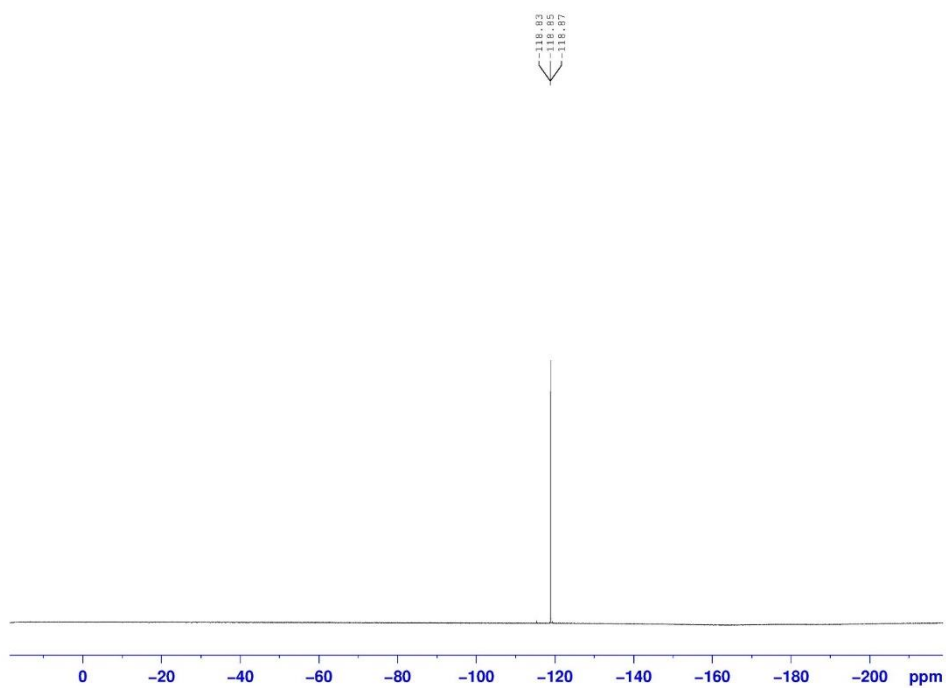

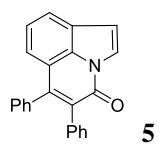

2254, AV 400MHz, Nov14

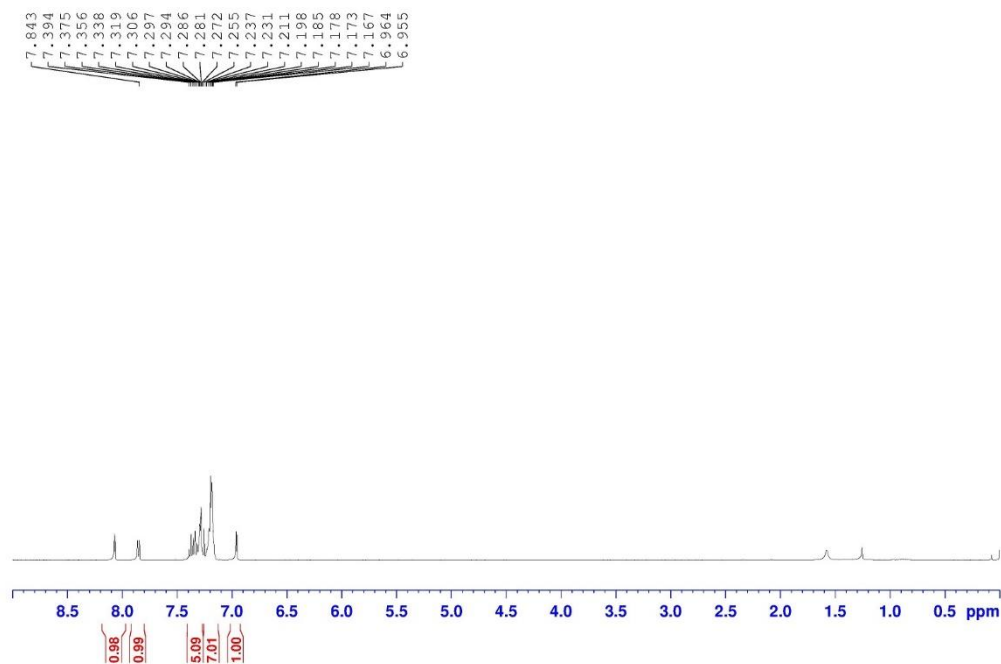

2254, AV 400MHz, Nov14

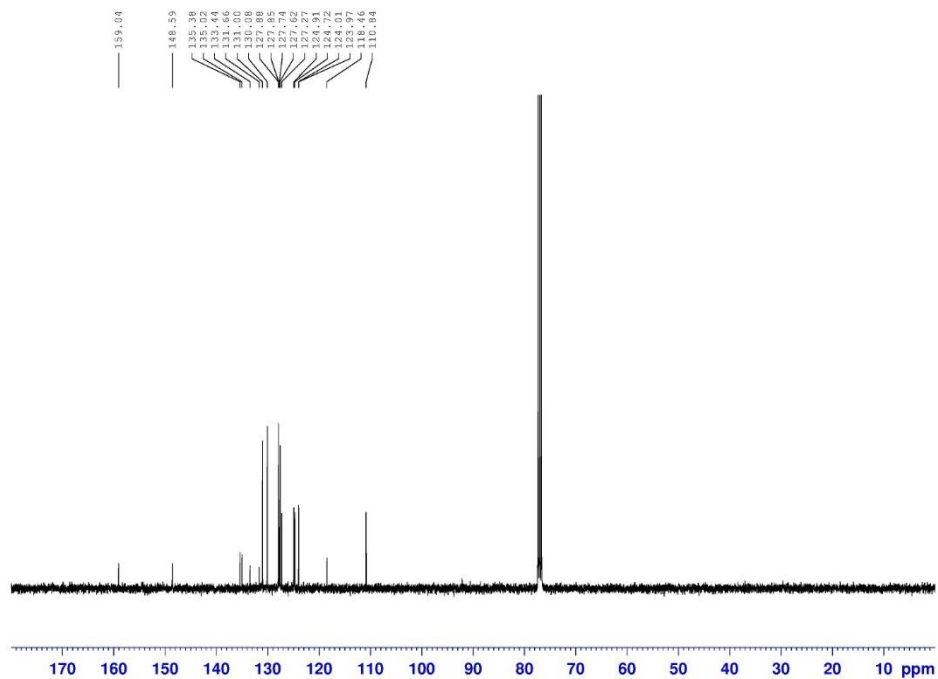

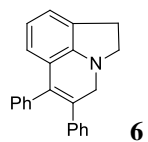

red-al, AV 400MHz, Nov14

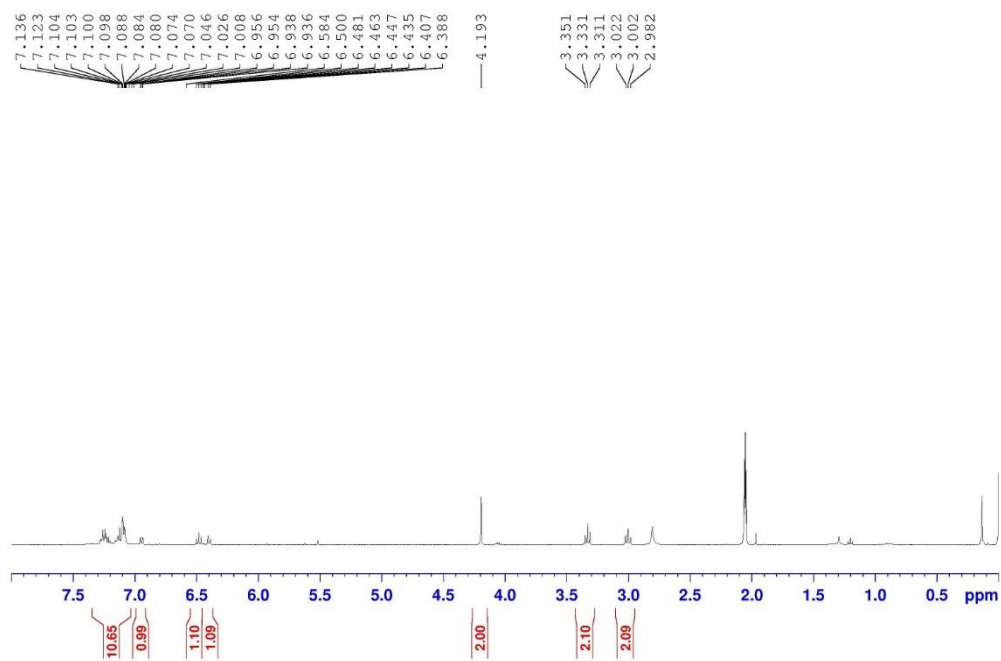

red-al, AV 400MHz, Nov14

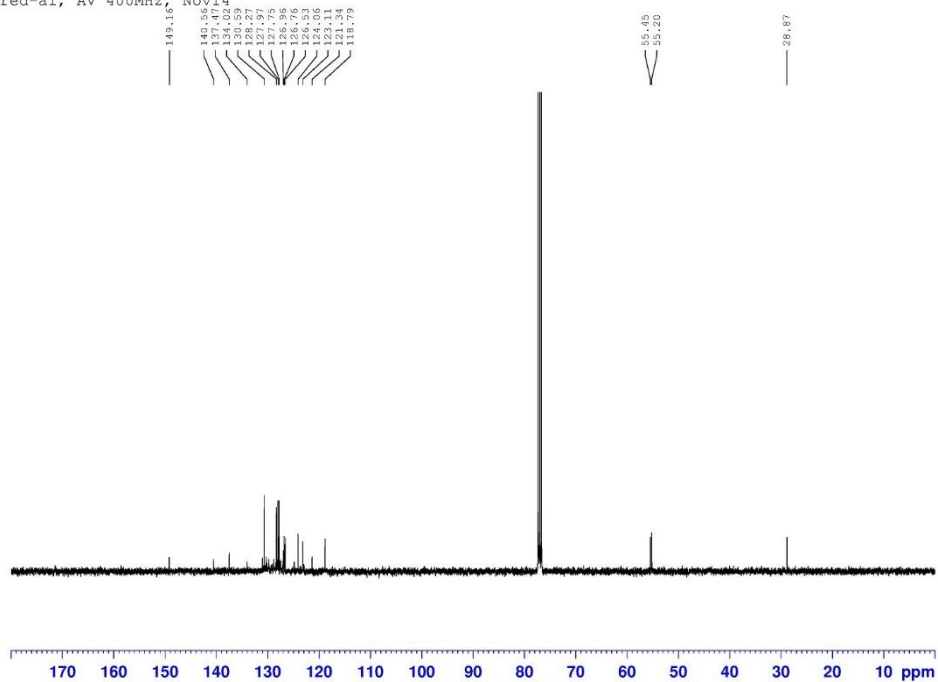

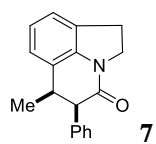

H2, AV500, Nov14

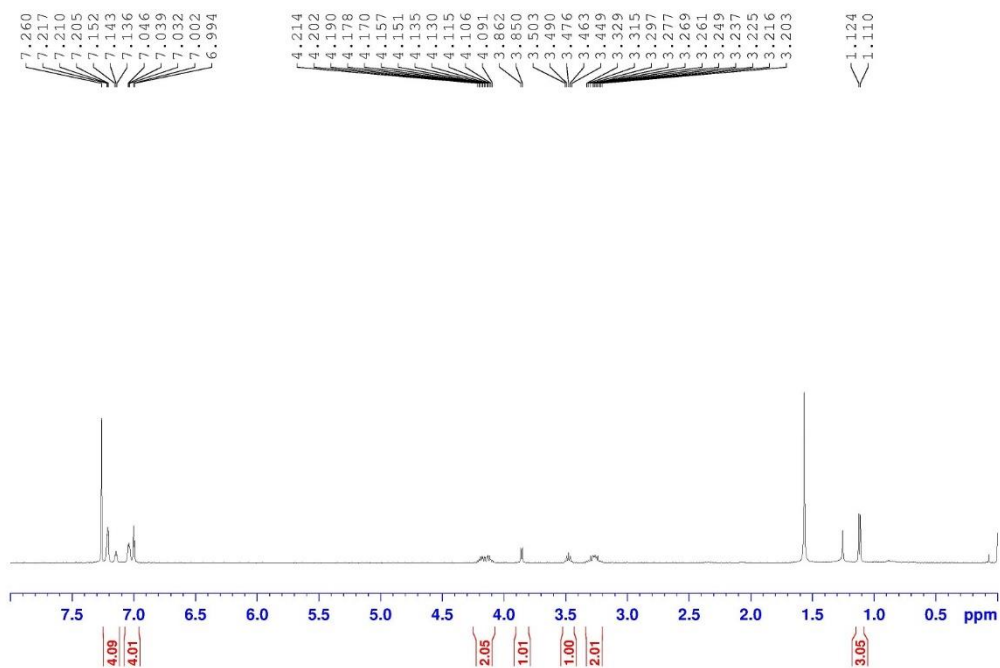

h2, AV 400MHz, Nov14

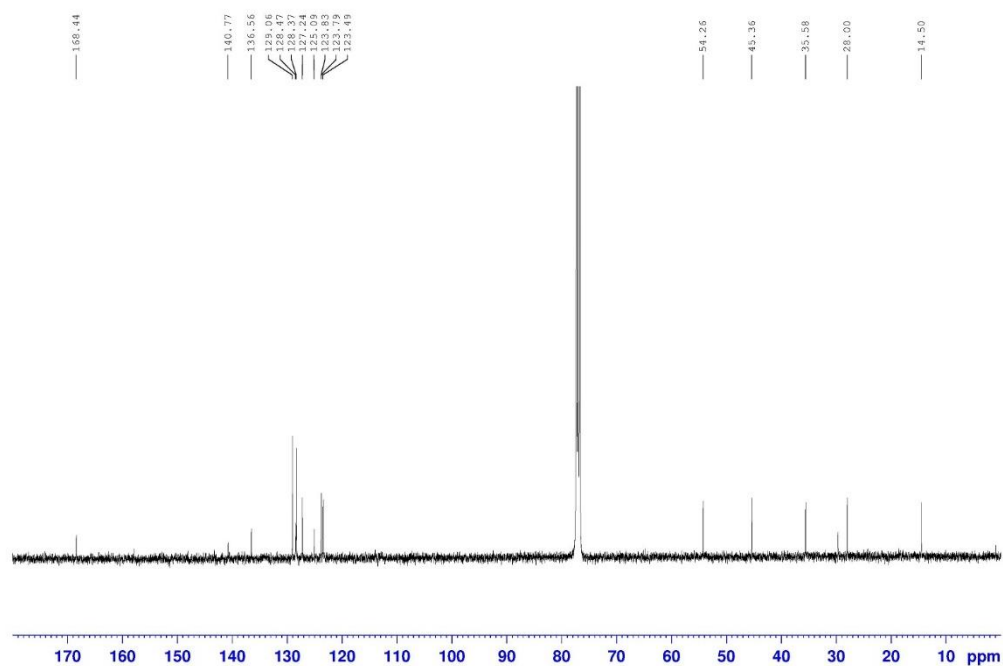

## X-ray Data

### X-Ray Structure for 3a

Cambridge Crystallographic Data Centre Deposition Number: 1042776

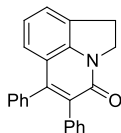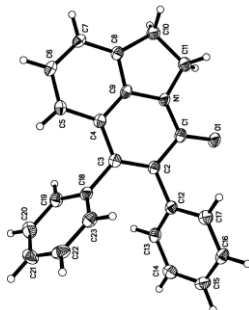

### X-Ray Structure for 3e

Cambridge Crystallographic Data Centre Deposition Number: 1042775

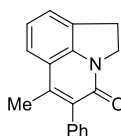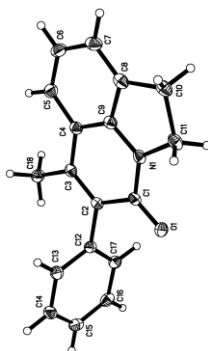

### X-Ray Structure for 3m

Cambridge Crystallographic Data Centre Deposition Number: 1042777

The whole molecule is disordered about a non-crystallographic 2-fold axis and the ratio of site occupancy was freely refined to 0.798/0.202. Restraints and constraint (eapd c18 c18a, sadi o2 c14 o2 c16, rigu, simu 0.02, same Br1 > O2) were used in the refinement to restrain the two components having similar molecular geometries and atomic displacement parameters.

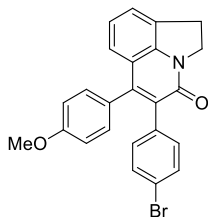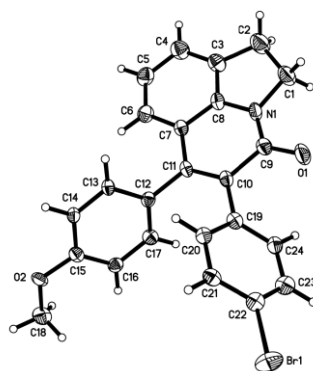

major

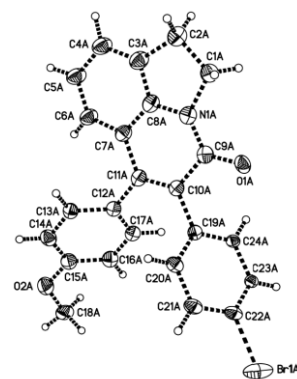

minor
